# Supplementary material for: Cost-effectiveness of total knee replacement in addition to non-surgical treatment: a 2-year outcome from a randomised trial in secondary care in Denmark
Source: PubMed Central journal article supplement — BMJ Open. 2020 Jan 15;10(1):e033495. doi: 10.1136/bmjopen-2019-033495 (PMC7044888; doi:10.1136/bmjopen-2019-033495), 2020-01-15

# BMJ Open

BMJ Open is committed to open peer review. As part of this commitment we make the peer review history of every article we publish publicly available.

When an article is published we post the peer reviewers' comments and the authors' responses online. We also post the versions of the paper that were used during peer review. These are the versions that the peer review comments apply to.

The versions of the paper that follow are the versions that were submitted during the peer review process. They are not the versions of record or the final published versions. They should not be cited or distributed as the published version of this manuscript.

BMJ Open is an open access journal and the full, final, typeset and author-corrected version of record of the manuscript is available on our site with no access controls, subscription charges or pay-per-view fees (<http://bmjopen.bmj.com>).

If you have any questions on BMJ Open's open peer review process please email [info.bmjopen@bmj.com](mailto:info.bmjopen@bmj.com)

# BMJ Open

## Cost-effectiveness of total knee replacement in addition to non-surgical treatment: 2-year outcome from a randomized trial

|                               |                                                                                                                                                                                                                                                                                                                                                                                                                                                                                                                                                                                                                                                                                                                                                                                                                                                                                                            |
|-------------------------------|------------------------------------------------------------------------------------------------------------------------------------------------------------------------------------------------------------------------------------------------------------------------------------------------------------------------------------------------------------------------------------------------------------------------------------------------------------------------------------------------------------------------------------------------------------------------------------------------------------------------------------------------------------------------------------------------------------------------------------------------------------------------------------------------------------------------------------------------------------------------------------------------------------|
| Journal:                      | <i>BMJ Open</i>                                                                                                                                                                                                                                                                                                                                                                                                                                                                                                                                                                                                                                                                                                                                                                                                                                                                                            |
| Manuscript ID                 | bmjopen-2019-033495                                                                                                                                                                                                                                                                                                                                                                                                                                                                                                                                                                                                                                                                                                                                                                                                                                                                                        |
| Article Type:                 | Original research                                                                                                                                                                                                                                                                                                                                                                                                                                                                                                                                                                                                                                                                                                                                                                                                                                                                                          |
| Date Submitted by the Author: | 07-Aug-2019                                                                                                                                                                                                                                                                                                                                                                                                                                                                                                                                                                                                                                                                                                                                                                                                                                                                                                |
| Complete List of Authors:     | Skou, Søren; Syddansk Universitet, Research Unit for Musculoskeletal Function and Physiotherapy, Department of Sports Science and Clinical Biomechanics; Næstved-Slagelse-Ringsted Hospitals, Region Zealand, Department of Physiotherapy and Occupational Therapy<br>Roos, Ewa; Syddansk Universitet Det Sundhedsvidenskabelige Fakultet, Sports Science and Clinical Biomechanics<br>Laursen, Mogens; Aalborg University Hospital; Aalborg Universitet, Department of Clinical Medicine<br>Arendt-Nielsen, Lars; Aalborg University, Department of Health Science and Technology<br>Rasmussen, Sten; Aalborg University Hospital; Aalborg University, Department of Clinical Medicine<br>Simonsen, Ole; Aalborg University Hospital, Orthopedic Surgery Research Unit; Aalborg Universitet, Department of Clinical Medicine<br>Ibsen, Rikke; I2minds<br>Larsen, Arendse ; VIVE<br>Kjellberg, Jakob; VIVE |
| Keywords:                     | Osteoarthritis, THERAPEUTICS, Randomized controlled trial, Knee Replacement, Medical economics                                                                                                                                                                                                                                                                                                                                                                                                                                                                                                                                                                                                                                                                                                                                                                                                             |
|                               |                                                                                                                                                                                                                                                                                                                                                                                                                                                                                                                                                                                                                                                                                                                                                                                                                                                                                                            |

SCHOLARONE™  
Manuscripts

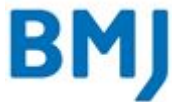

I, the Submitting Author has the right to grant and does grant on behalf of all authors of the Work (as defined in the below author licence), an exclusive licence and/or a non-exclusive licence for contributions from authors who are: i) UK Crown employees; ii) where BMJ has agreed a CC-BY licence shall apply, and/or iii) in accordance with the terms applicable for US Federal Government officers or employees acting as part of their official duties; on a worldwide, perpetual, irrevocable, royalty-free basis to BMJ Publishing Group Ltd ("BMJ") its licensees and where the relevant Journal is co-owned by BMJ to the co-owners of the Journal, to publish the Work in this journal and any other BMJ products and to exploit all rights, as set out in our [licence](#).

The Submitting Author accepts and understands that any supply made under these terms is made by BMJ to the Submitting Author unless you are acting as an employee on behalf of your employer or a postgraduate student of an affiliated institution which is paying any applicable article publishing charge ("APC") for Open Access articles. Where the Submitting Author wishes to make the Work available on an Open Access basis (and intends to pay the relevant APC), the terms of reuse of such Open Access shall be governed by a Creative Commons licence – details of these licences and which [Creative Commons](#) licence will apply to this Work are set out in our licence referred to above.

Other than as permitted in any relevant BMJ Author's Self Archiving Policies, I confirm this Work has not been accepted for publication elsewhere, is not being considered for publication elsewhere and does not duplicate material already published. I confirm all authors consent to publication of this Work and authorise the granting of this licence.

1  
2  
3  
4 1 **Cost-effectiveness of total knee replacement in addition to non-surgical treatment: 2-year**  
5 **outcome from a randomized trial**  
6  
7

8 3 Søren T. Skou<sup>1, 2, 3, 4</sup>; Ewa M. Roos<sup>2</sup>; Mogens Laursen<sup>1,4,5</sup>; Lars Arendt-Nielsen<sup>4</sup>; Sten  
9 4 Rasmussen<sup>1,4,5</sup>; Ole Simonsen<sup>1,4,5</sup>; Rikke Ibsen<sup>6</sup>; Arendse Tange Larsen<sup>7</sup>; Jakob Kjellberg<sup>7</sup>

10 5 <sup>1</sup> Orthopedic Surgery Research Unit, Aalborg University Hospital, 9000 Aalborg, Denmark  
11  
12

13 6 <sup>2</sup> Research Unit for Musculoskeletal Function and Physiotherapy, Department of Sports Science and  
14 7 Clinical Biomechanics, University of Southern Denmark, 5230 Odense, Denmark  
15  
16

17 8 <sup>3</sup> Department of Physiotherapy and Occupational Therapy, Næstved-Slagelse-Ringsted Hospitals,  
18 9 Region Zealand, 4200 Slagelse, Denmark  
19  
20

21 10 <sup>4</sup> Center for Sensory-Motor Interaction (SMI), Department of Health Science and Technology,  
22 11 Faculty of Medicine, Aalborg University, 9220 Aalborg, Denmark  
23  
24

25 12 <sup>5</sup> Department of Clinical Medicine, Aalborg University, 9220 Aalborg, Denmark  
26  
27

28 13 <sup>6</sup> I2minds, 8000 Aarhus, Denmark  
29  
30

31 14 <sup>7</sup> VIVE – The Danish Centre of Applied Social Science, 1152 Copenhagen, Denmark  
32  
33

34 15 **Original manuscript for BMJ Open**  
35  
36

37 16 **Corresponding Author:**  
38  
39

40 17 STS: [stskou@health.sdu.dk](mailto:stskou@health.sdu.dk) ; +4523708640  
41  
42

43 18 Research Unit for Musculoskeletal Function and Physiotherapy, Department of Sports Science and  
44 19 Clinical Biomechanics, University of Southern Denmark; 55 Campusvej; DK-5230 Odense M  
45  
46  
47  
48  
49  
50

51 21 Manuscript: 3.649 words; Abstract: 258 words  
52  
53

54 22 **Running headline:** Cost-effectiveness of knee replacement in knee osteoarthritis  
55  
56  
57  
58  
59  
60

1  
2  
3  
4  
5  
6  
7  
8  
9  
10  
11  
12  
13  
14  
15  
16  
17  
18  
19  
20  
21  
22  
23  
24  
25  
26  
27  
28  
29  
30  
31  
32  
33  
34  
35  
36  
37  
38  
39  
40  
41  
42  
43  
44  
45  
46  
47  
48  
49  
50  
51  
52  
53  
54  
55  
56  
57  
58  
59  
60

## 25 Abstract

26 **Objective:** To assess the 24-month cost-effectiveness of total knee replacement (TKR) plus non-  
27 surgical treatment compared to non-surgical treatment alone.

28 **Methods:** 100 adults with moderate to severe knee osteoarthritis found eligible for TKR by an  
29 orthopedic surgeon in secondary care were randomized to TKR plus 12 weeks of supervised non-  
30 surgical treatment (exercise, education, diet, insoles and pain medication) or to supervised non-  
31 surgical treatment alone. Including quality-adjusted life years (QALYs) data from baseline, 3, 6, 12  
32 and 24 months, effectiveness was measured as change at 24 months. Healthcare costs and transfer  
33 payments were derived from national registries. Incremental health care costs, and incremental cost-  
34 effectiveness ratios (ICERs) were calculated. A probabilistic sensitivity analysis was conducted and  
35 the probability of cost-effectiveness was estimated at the 22,665 Euros/QALY threshold defined by  
36 the National Institute for Health and Care Excellence.

37 **Results:** TKR plus non-surgical treatment was more expensive (mean of 23,076 vs. 14,514 Euros  
38 over 24 months) but also more effective than non-surgical treatment alone (mean 24-month  
39 improvement in QALY of 0.195 vs. 0.056). While cost-effective in the unadjusted scenario (ICER  
40 of 18,497 Euros/QALY), TKR plus non-surgical treatment was not cost-effective compared to non-  
41 surgical treatment alone in the adjusted, base-case scenario (ICER of 32,611 Euros/QALY) with a  
42 probability of cost-effectiveness of 23.2%. When including deaths, TKR plus non-surgical  
43 treatment was still not cost-effective (ICERs of 46,277 to 64,208 Euros/QALY).

44 **Conclusions:** From a 24-month perspective, TKR plus non-surgical treatment is not cost-effective  
45 compared to non-surgical treatment alone in patients with moderate to severe knee osteoarthritis.  
46 Further research assessing the long-term cost-effectiveness of TKR is needed.

1  
2  
3  
4 47 **Trial registration:** ClinicalTrials.gov (NCT01410409).  
5  
6

7 48 **Keywords:** Osteoarthritis; Therapeutics; Randomized controlled trial; Knee Replacement; Medical  
8  
9 economics  
10 49

## 11 12 13 50 **Strengths and limitations of this study** 14 15

- 16  
17 51 • This study is the first economic evaluation of total knee replacement that is based on a  
18  
19 52 randomized trial of surgical and non-surgical treatment thereby providing highly comparable  
20  
21 53 treatment groups.  
22  
23
- 24 54 • Cost data was retrieved from the Danish health registries which contain detailed, high-quality  
25  
26 55 information on health sector costs, social costs, and prescription medication on individual  
27  
28 56 patients, and effectiveness data was systematically and rigorously collected in the randomized  
29  
30  
31 57 trial.  
32
- 33 58 • The 24-month time horizon limits conclusions on the long-term cost-effectiveness of total knee  
34  
35 59 replacement  
36  
37

38 60

39  
40 61

41  
42 62

43  
44 63

45  
46 64

47  
48 65

49  
50 66

51  
52 67

53  
54 68

55  
56 69

57  
58  
59  
60

1  
2  
3  
4  
5  
6  
7  
8  
9  
10  
11  
12  
13  
14  
15  
16  
17  
18  
19  
20  
21  
22  
23  
24  
25  
26  
27  
28  
29  
30  
31  
32  
33  
34  
35  
36  
37  
38  
39  
40  
41  
42  
43  
44  
45  
46  
47  
48  
49  
50  
51  
52  
53  
54  
55  
56  
57  
58  
59  
60

## 70 INTRODUCTION

71 Knee osteoarthritis (OA) is one of the leading contributors to the global burden of disease<sup>1</sup> with  
72 considerable pain and functional limitations for the individual<sup>2</sup>. The disease has been estimated to  
73 affect 250 million people worldwide<sup>3</sup>, with total European costs estimated to be 817 billion Euros  
74 per year<sup>4</sup>. Over the last 20 years, the prevalence of knee OA has increased substantially<sup>5</sup> and is  
75 expected to continue to increase<sup>1</sup> and amplify the societal burden.

76 In patients with end-stage knee OA, total knee replacement (TKR) is considered an effective<sup>6</sup> and  
77 cost-effective<sup>7</sup> treatment. However, approximately 20% continue to have chronic pain after  
78 otherwise successful surgery<sup>8</sup> and, in addition, the procedure is associated with a risk of serious  
79 adverse events<sup>9</sup>. Furthermore, clinical guidelines reflecting high-quality evidence from recent  
80 decades highlight non-surgical treatments as an effective and less costly treatment for patients with  
81 knee OA<sup>10</sup>. As the number of TKR procedures performed each year has increased dramatically  
82 since the 1970s<sup>11</sup>, with around 600,000 annual procedures in the United States alone<sup>12</sup>, evidence of  
83 the effectiveness and cost-effectiveness of TKR in comparison to non-surgical treatments is  
84 warranted<sup>7</sup>.

85 In 2015, a randomized trial assessing the effectiveness of TKR plus non-surgical treatment as  
86 compared with non-surgical treatment alone was published<sup>13</sup>. Being the first of its kind, the study  
87 provided high-quality evidence on the effects of TKR and, at the same time, offered a unique  
88 opportunity to study the cost-effectiveness of TKR in two highly comparable treatment groups,  
89 thereby making an important contribution to previous non-randomized analyses of TKR cost-  
90 effectiveness<sup>7,14</sup>.

91 The purpose of the current study was to report the 24 months cost-effectiveness of TKR plus non-  
92 surgical treatment as compared to non-surgical treatment alone using quality-adjusted life years

1  
2  
3  
4 93 (QALYs) data from the randomized trial and the unique Danish health registries which contain  
5  
6 94 detailed information on health sector costs, social costs, and prescription medication on the trial  
7  
8  
9 95 participants. We hypothesized that TKR plus non-surgical treatment would be a more cost-effective  
10  
11 96 procedure compared to non-surgical treatment alone due to greater improvements in quality of life  
12  
13 97 counterbalancing the expected additional cost related to the surgery.  
14  
15  
16  
17 98  
18  
19  
20 99  
21  
22  
23 100  
24  
25  
26 101  
27  
28  
29 102  
30  
31  
32 103  
33  
34  
35 104  
36  
37  
38 105  
39  
40  
41  
42 106  
43  
44  
45 107  
46  
47  
48 108  
49  
50  
51 109  
52  
53  
54 110  
55  
56  
57 111  
58  
59  
60

For peer review only



## 1 2 3 4 5 112 **METHODS**

### 8 9 113 **Study design**

12 114 This was a pre-planned baseline to 24 months cost-utility analysis from a parallel group assessor-  
13  
14  
15 115 blinded randomized trial (1:1 ratio) that conforms to the CHEERS statement for reporting health  
16  
17 116 economic evaluations<sup>15</sup>. Costs were collected from a limited societal perspective (i.e. health care  
18  
19 117 costs and public transfer payments), with QALYs used as the outcome measure. Individual-level  
20  
21  
22 118 data were obtained from the clinical trial and linked with data from national registries for use in the  
23  
24 119 analyses.

27 120 A brief presentation of the trial methods is provided below. Full details about the process for  
28  
29  
30 121 recruitment, criteria for eligibility, the randomization procedure, allocation concealment and  
31  
32 122 detailed description of the interventions have been published previously <sup>16</sup>.

### 35 36 123 **Ethics**

40 124 The study was designed to follow the principles of the Declaration of Helsinki and ethics approval  
41  
42 125 was obtained from the local Ethics Committee of The North Denmark Region (N-20110024) and the  
43  
44 126 study was registered at ClinicalTrials.gov (NCT01410409).

### 47 48 127 **Participants**

51 128 One hundred patients diagnosed with symptomatic and moderate to severe radiographic knee OA  
52  
53  
54 129 considered eligible for TKR by the orthopedic surgeon were included in the study. The study had  
55  
56 130 three major exclusion criteria: 1) mean pain the previous week above 60 mm on a 100-mm visual  
57  
58  
59  
60

1  
2  
3  
4 131 analogue scale, 2) previous knee replacement on the same side, and 3) need for bilateral  
5  
6 132 simultaneous TKR.  
7  
8  
9

## 10 133 **Setting and time horizon**

11  
12  
13  
14 134 Patients were recruited between September 2011 and December 2013 from one of two specialized,  
15  
16 135 public outpatient clinics at Aalborg University Hospital, Denmark (Frederikshavn and Farsoe), and  
17  
18 136 all patients provided informed written consent before being enrolled. To have identical time periods  
19  
20 137 for the whole population, we compared resource use and costs 1 year before randomization (pre-  
21  
22  
23 138 period) to resource use and costs 2 years after randomization for each individual patient.  
24  
25

## 26 139 **Randomization procedure and allocation concealment**

27  
28  
29  
30 140 The randomization schedule was generated a priori in permuted blocks of eight, stratified by site,  
31  
32 141 and the allocation numbers were concealed in sealed, opaque envelopes prepared by an independent  
33  
34  
35 142 staff member. One research assistant at each of the two sites had access to the envelopes, opening  
36  
37 143 them only after informed consent and baseline outcomes had been obtained.  
38  
39  
40

## 41 144 **Comparators**

42  
43  
44  
45 145 Patients were randomly assigned (1:1) to 1) undergo TKR plus 12 weeks of supervised non-surgical  
46  
47 146 treatment or 2) receive only the 12 weeks of supervised non-surgical treatment.  
48  
49  
50

## 51 147 **Total knee replacement**

52  
53  
54 148 A total cemented prosthesis with patellar resurfacing (NexGen, CR-Flex, fixed bearing or LPS-Flex,  
55  
56 149 fixed bearing, Zimmer, Warsaw, Indiana, USA) was inserted by high-volume orthopedic specialists  
57  
58  
59  
60

1  
2  
3  
4  
5  
6  
7  
8  
9  
10  
11  
12  
13  
14  
15  
16  
17  
18  
19  
20  
21  
22  
23  
24  
25  
26  
27  
28  
29  
30  
31  
32  
33  
34  
35  
36  
37  
38  
39  
40  
41  
42  
43  
44  
45  
46  
47  
48  
49  
50  
51  
52  
53  
54  
55  
56  
57  
58  
59  
60

150 using the surgical methods recommended by the manufacturer<sup>17</sup>. Surgery was performed by the  
151 surgeon in charge of the assessment at the time of recruitment.

## 152 **Supervised non-surgical treatment**

153 The 12-week individualized, non-surgical treatment program included exercise, patient education,  
154 and insoles, with dietary advice and/or pain medication prescribed if indicated. The treatments were  
155 delivered by physiotherapists and dieticians at Aalborg University Hospital, Denmark.

### 156 **Exercise**

157 The NEuroMuscular EXercise training program (NEMEX), previously found feasible in patients  
158 with moderate to severe knee OA awaiting joint replacement<sup>18</sup>, was administered in 60-min group-  
159 based sessions twice weekly supervised by a physiotherapist. To increase long-term adherence, after  
160 12 weeks of exercise, the patients undertook a transition period of 8 weeks where the exercise  
161 program was increasingly performed at home.

### 162 **Patient education**

163 Patient education was delivered as two 60-minute group-based educational sessions which actively  
164 engaged the patients in their treatment. The sessions focused on disease characteristics, advice  
165 about treatment and self-help. Sessions were held in groups of up to 16 patients and were facilitated  
166 by the project physiotherapist.

### 167 **Dietary advice**

168 Patients with a body mass index  $\geq 25$  at baseline had four individual 1-hour consultations with a  
169 dietician with the overall aim of reducing body weight by at least 5%<sup>19</sup>. The program was based on  
170 motivational interviewing<sup>20</sup>.

## 171 **Insoles**

172 Patients received individually fitted full-length Formthotics Original Dual Medium (perforated)  
173 insoles with medial arch support (Foot Science International, Christchurch, New Zealand). A 4°  
174 lateral wedge was added to the insoles if patients had a knee-lateral-to-foot position (the knee  
175 moves over, or lateral, to the 5th toe in three or more of five trials)<sup>21</sup>.

## 176 **Pain medication**

177 Paracetamol 1 g four times daily, ibuprofen 400 mg three times daily, and pantoprazole 20 mg daily  
178 were prescribed by the orthopedic surgeon if indicated. Prescriptions were reassessed every 3 weeks  
179 and the patients were instructed to contact the study team if they were uncertain about the need for  
180 continued pain medication.

## 181 **Booster sessions**

182 After the 12-week non-surgical program and the 8-week transition period and until the 12-month  
183 follow up, a physiotherapist phoned the patients monthly to support exercise adherence. Patients  
184 consulting the dietician were telephoned twice by the dietician to encourage dietary adherence.

## 185 **Patient and public involvement**

186 While no patients were involved in this cost-effectiveness analysis, the specific content of the non-  
187 surgical treatment was guided by feedback from patients to ensure feasibility and acceptance.

## 188 **Measurement of resource use and costs**

189 Information on resource use and costs, including health care costs and public transfer income for  
190 each patient, was retrieved from Danish national registries. In Denmark, the Danish Civil  
191 Registration System assigns every citizen a personal identification number (central personal

1  
2  
3  
4 192 registration number), which allows for the linking of information between national registries at the  
5  
6  
7 193 individual level. This enables identification of the patients in the trial and calculations of costs  
8  
9 194 associated with these individuals. Health care costs comprised expenses associated with inpatient  
10  
11 195 services, outpatient visits, primary care services and prescription medication. Inpatient services  
12  
13 196 were assessed as both including and excluding TKR surgeries during the study period. Inpatient and  
14  
15  
16 197 outpatient costs are available from the National Patient Registry (NPR), which contains information  
17  
18 198 on all kinds of patient contacts including diagnoses and diagnostic and treatment procedures.  
19  
20 199 Linking the data with the Danish Case Mix System (Diagnosis-Related Groups) enabled estimation  
21  
22  
23 200 of associated costs. Primary care included visits to the general practitioner, medical specialist,  
24  
25 201 physiotherapist, chiropractor, laboratory work and others. Resources related to utilization of the  
26  
27 202 primary care services were derived from the Danish National Health Insurance Service Register.  
28  
29  
30 203 Costs were estimated for all prescription medication; pain medication (ATC-codes N02A, N02B  
31  
32 204 and M01A) and non-pain medication (i.e. anything else besides pain medication), respectively.  
33  
34 205 Medication costs were calculated by multiplying the retail price with the prescribed quantity,  
35  
36 206 available from the Danish Medicines Agency.  
37  
38  
39  
40 207 Non protocol-driven resources, e.g. costs of recruitment, were included. As both groups received  
41  
42 208 the same supervised non-surgical treatment (as described above), this cost was not included for  
43  
44 209 either group. The cost of the non-surgical treatment was estimated to be between 560 € (actual cost  
45  
46 210 of the non-surgical treatment in the trial) to 1646 € (estimated cost of the non-surgical treatment in  
47  
48  
49 211 private practice in Denmark) per person.  
50  
51  
52 212 To increase the international applicability of the study, costs were adjusted to 2015-equivalent price  
53  
54 213 levels using the consumer price index and converted to Euros (1 € = 7.45 DKK). 1 Euro  
55  
56 214 corresponded to 1.13 US dollars at the 2017 average exchange rate.  
57  
58  
59  
60

1  
2  
3  
4 215 Public transfer income was calculated as the number of weeks a person was receiving sick leave  
5  
6 216 pay, disability pension, early retirement and unemployment benefits (including activated persons).  
7  
8  
9 217 About half of the participants were older than 64 years (56%), and retired (age pension). This  
10  
11 218 information was available from national registries from Statistics Denmark.  
12  
13

## 14 219 **Measurement of effectiveness**

16  
17  
18 220 A generic measure of health in terms of QALYs gained was used as the effectiveness measure. This  
19  
20 221 is a composite measure that considers both the quantity and quality of life of an individual. The  
21  
22  
23 222 maximum achievable QALY is 1, reflecting one year of full health, whereas a QALY value of 0  
24  
25 223 reflects death. Health-related quality of life (HRQoL) was measured using the three-level version of  
26  
27 224 the EuroQol Group 5-Dimension Self-Report Questionnaire (EQ-5D), including the score on the  
28  
29  
30 225 descriptive index (ranging from -0.59 to 1.00) and the score on the visual analogue scale (ranging  
31  
32 226 from 0 to 100)<sup>22</sup>, at baseline, at 3 months, 6 months, 12 months, and at the 24 months follow-up.  
33  
34 227 The baseline to 12 months EQ-5D data was previously published in the primary RCT report<sup>13</sup>, but  
35  
36 228 has not previously been used for cost-effectiveness analyses. The EQ-5D-3L has five digits  
37  
38  
39 229 measuring mobility, self-care, usual activities, pain discomfort and anxiety/depression. The  
40  
41 230 descriptive index is based on a Danish “time trade-off” value set<sup>23</sup>, which is a method used to  
42  
43 231 evaluate the relative amount of time patients would be willing to sacrifice to avoid a certain poor  
44  
45  
46 232 health state. The patients completed the EQ-5D at baseline and all follow-up visits at the  
47  
48 233 Department of Occupational Therapy and Physiotherapy, Aalborg University Hospital, Denmark.  
49

1  
2  
3  
4  
5  
6  
7  
8  
9  
10  
11  
12  
13  
14  
15  
16  
17  
18  
19  
20  
21  
22  
23  
24  
25  
26  
27  
28  
29  
30  
31  
32  
33  
34  
35  
36  
37  
38  
39  
40  
41  
42  
43  
44  
45  
46  
47  
48  
49  
50  
51  
52  
53  
54  
55  
56  
57  
58  
59  
60

## 239 **Analytical methods**

### 240 **Missing data**

241 Missing data were handled by using multiple imputation, which enables individuals with  
242 incomplete data to be included in the analysis. The underlying assumption when using multiple  
243 imputation is that data are missing at random, i.e. the probability of missing values is *not* dependent  
244 on unobserved data. Missing values occurred on utilities at 24 months, and thus, QALY values were  
245 imputed at 24 months.

### 246 **Costs in the pre-period, Year 1, and Year 2**

247 The costs of the two groups were compared by using arithmetic means for each period. The  
248 statistical significance of the difference between groups was assessed using the bootstrapped t-test.

### 249 **Cost-effectiveness analyses**

250 Regression analyses were used to estimate incremental costs and QALYs. Costs in the regression  
251 analyses only included health care costs. Because costs are normally right-skewed and QALYs left-  
252 skewed, a gamma distribution was assumed in the regression analyses. Both regression analyses  
253 were adjusted for covariates in the base-case analysis, i.e. the cost regression was adjusted for age,  
254 sex and baseline costs and the QALY regression was adjusted for age, sex and baseline QALY.  
255 Two additional scenarios were also considered: one not taking covariates into account, i.e. without  
256 adjustment (Scenario 1), and the other not considering either covariates or missing  
257 values/imputations (Scenario 2).

258 QALY gains or losses were calculated as the difference in QALYs from baseline to 24 months  
259 taking into account changes in utility over time, i.e. from baseline to 3 months, 6 months, 12  
260 months and 24 months follow-up, respectively. Hence, the calculation was processed as follows:

$$QALY\ gained = (QALY\ 3\ months - QALY\ baseline) * 0.25 + (QALY\ 6\ months - QALY\ baseline) * 0.25 \\ + (QALY\ 12\ months - QALY\ baseline) * 0.5 + (QALY\ 24\ months - QALY\ baseline)_{discounted} * 1$$

Costs and effects were discounted by 3%.

### Sub-analysis

A sub-analysis, including deaths during the study period, was conducted for each scenario (Base-case scenario, Scenario 1 and Scenario 2).

### Sensitivity analyses

A probabilistic sensitivity analysis was carried out for each scenario in the primary analysis and the sub-analysis, respectively. The probabilistic sensitivity analysis takes into account all parameter uncertainty at once. Incremental costs and QALYs were used to simulate 10,000 random draws resulting in a scatterplot reflecting the probability of cost-effectiveness. In Denmark, no officially set willingness-to-pay threshold exists. Instead, we used a threshold of 22,665 Euros/QALY or lower corresponding to the decision rule defined by the National Institute for Health and Care Excellence (NICE) (£ 20,000)<sup>24</sup>.

All analyses were performed using SAS 9.1.3 (SAS Institute, North Carolina, USA) and the significance level was set to 0.05.

## RESULTS



1  
2  
3  
4  
5  
6  
7  
8  
9  
10  
11  
12  
13  
14  
15  
16  
17  
18  
19  
20  
21  
22  
23  
24  
25  
26  
27  
28  
29  
30  
31  
32  
33  
34  
35  
36  
37  
38  
39  
40  
41  
42  
43  
44  
45  
46  
47  
48  
49  
50  
51  
52  
53  
54  
55  
56  
57  
58  
59  
60

## 281 Patient characteristics

282 The baseline characteristics of the two groups of patients and patient flow are presented in Table 1  
283 and Fig 1, respectively.

284 \*\*\*\*\* PLACE TABLE 1 AND FIGURE 1 AROUND HERE \*\*\*\*\*

286 Out of the 100 patients randomized, 24 months follow-up data were available for 47/50 (94%) in  
287 the non-surgical group and 43/50 (86%) in the TKR plus non-surgical group. Administrative data  
288 yielded that 16 out of 50 patients (32%) from the non-surgical group had a TKR before the 24  
289 months follow-up: 13 patients from baseline to 12 months and three patients between 12 and 24  
290 months. Mean duration (range) from initiating the non-surgical treatment to the TKR was 8.7 (2.6 to  
291 21.5) months. One of the 50 patients (2%) in the TKR plus non-surgical group decided not to  
292 undergo TKR anyway. One patient in the TKR plus non-surgical group had three revision surgeries  
293 ending up with the prosthesis being removed and the knee fused following a deep infection. Due to  
294 severe knee stiffness during the rehabilitation period after TKR, three patients in the TKR plus non-  
295 surgical group and one patient in the non-surgical group who had TKR later required manipulation  
296 of the knee under anesthesia. The mean follow-up time was 24.0 and 24.3 months in the TKR plus  
297 non-surgical group and the non-surgical group, respectively.

298  
299 Table 2 shows health care costs and public transfer income given as weeks in the pre-period, year 1  
300 (12 months) and year 2 (24 months), respectively. The groups had similar health care costs during  
301 the year prior to randomization (2,695 vs. 2,644 Euros). At 12 months after randomization, health  
302 care costs in the TKR plus non-surgical group were more than double those of the non-surgical

1  
2  
3  
4 303 group (16,343 vs. 7,028 Euros), mostly due to the surgical procedure. Although not statistically  
5  
6 304 significant, the costs in the TKR plus non-surgical group were lower at the 24 months follow-up  
7  
8  
9 305 (6,733 vs. 7,486 €) because some patients in the non-surgical group underwent TKR. No significant  
10  
11 306 between-group differences were found in weeks of incurring public transfer income.  
12  
13

14  
15 307 \*\*\*\*\* PLACE TABLE 2 AROUND HERE \*\*\*\*\*  
16

17 308  
18  
19  
20 309 The non-surgical group experienced a gain in QALYs of 0.056 from baseline to 24 months while  
21  
22 310 the TKR plus non-surgical group experienced a gain of 0.195, with the largest increases in QALYs  
23  
24  
25 311 in both groups from baseline to 3 months (see Table 3 for QALY values at the different time  
26  
27 312 points).  
28  
29

30 313 \*\*\*\*\* PLACE TABLE 3 AROUND HERE \*\*\*\*\*  
31

32 314  
33  
34  
35 315 Incremental costs and QALYs for each scenario are presented in Table 4. In all scenarios, TKR plus  
36  
37 316 non-surgical treatment was more expensive, but also more effective in terms of QALY gain.  
38  
39  
40 317 Incremental cost-effectiveness ratios (ICERs) and the probability of cost-effectiveness at the  
41  
42 318 willingness-to-pay threshold for each scenario are also presented in Table 4. In the Base-case  
43  
44  
45 319 (adjusted) scenario, TKR plus non-surgical treatment costed 32,611 Euros per QALY gained, which  
46  
47 320 is above the threshold for willingness-to-pay defined by NICE (22,665 Euros/QALY). However, in  
48  
49 321 the unadjusted Scenario 1 and unadjusted and without imputation of missing values (scenario 2) the  
50  
51 322 ICERs were below the threshold (19,917 Euros/QALY and 18,497 Euros/QALY, respectively). The  
52  
53  
54 323 probability of cost-effectiveness of TKR plus non-surgical treatment was only 23.2% in the  
55  
56 324 (adjusted) Base-case scenario but increased to 58.3% and 61.9% in Scenarios 1 and 2, respectively.  
57  
58  
59 325  
60

1  
2  
3  
4 326 \*\*\*\*\* PLACE TABLE 4 AROUND HERE \*\*\*\*\*  
5  
6  
7 327  
8  
9

## 10 **Sub-analysis including deaths**

11 328  
12  
13  
14 329 Three persons died in the TKR plus non-surgical treatment group and one person in the non-  
15  
16 330 surgical treatment only group. Including deaths in the analysis decreased the QALY gained in both  
17  
18  
19 331 groups. The non-surgical group experienced a gain in QALYs of 0.040 from baseline to 24 months  
20  
21 332 while the TKR plus non-surgical group experienced a gain of 0.136, with the largest increases in  
22  
23 333 QALYs in both groups from baseline to 3 months (see Table 5 for QALY values at the different  
24  
25  
26 334 time points).  
27  
28

29 335 \*\*\*\*\* PLACE TABLE 5 AROUND HERE \*\*\*\*\*  
30  
31 336

32  
33 337 Including deaths in the regression analysis changed the estimates of incremental costs and QALYs  
34  
35 338 (Table 6). TKR plus non-surgical treatment was still more expensive and more effective for all  
36  
37 339 scenarios but in all three scenarios the ICER exceeded the NICE threshold. In the Base-case  
38  
39  
40 340 scenario, the ICER was more than twice as high as the threshold for willingness-to-pay defined by  
41  
42 341 NICE (22,665 Euros/QALY), and the probability of cost-effectiveness was only 7.8%. In Scenario  
43  
44 342 1 and 2 the probability of cost-effectiveness was 12.4% and 13.8%, respectively.  
45  
46  
47 343  
48  
49

50  
51 344 \*\*\*\*\* PLACE TABLE 6 AROUND HERE \*\*\*\*\*  
52

## 53 345 **DISCUSSION**

54  
55  
56 346 TKR plus non-surgical treatment was more expensive, but also more effective than non-surgical  
57  
58  
59 347 treatment alone. The cost-utility analysis demonstrated that TKR plus non-surgical treatment was  
60

1  
2  
3  
4 348 not cost-effective compared to non-surgical treatment alone from a 24-month limited societal  
5  
6  
7 349 perspective when adjusting for covariates and imputing missing values. Results were sensitive to  
8  
9 350 changes, as the treatment was cost-effective in the unadjusted scenario.  
10  
11

12 351 Given the extensive burden of knee OA<sup>3,4</sup>, there is considerable societal demand for evidence on  
13  
14 352 cost-effective evidence-based treatments<sup>25</sup>. The current study provides the first direct comparison of  
15  
16 353 two different treatment strategies in terms of cost-effectiveness for patients with moderate to severe  
17  
18 354 symptomatic and radiographic knee OA. The cost-utility analysis was conducted alongside a  
19  
20 355 randomized trial, which demonstrated that TKR plus non-surgical treatment compared to non-  
21  
22 356 surgical treatment alone was twice as effective in terms of pain relief and functional  
23  
24 357 improvements<sup>13,26</sup>. Therefore, we hypothesized that TKR would be a cost-effective procedure due to  
25  
26 358 higher improvements in quality of life counterbalancing the expected additional cost related to the  
27  
28 359 procedure. However, in contrast to our hypothesis, TKR plus non-surgical treatment was not found  
29  
30 360 to be cost-effective compared to non-surgical treatment alone from a 24 months perspective. The  
31  
32 361 cost per QALY gained exceeded the threshold defined by NICE by approximately 10,000 Euros<sup>24</sup>.  
33  
34 362 However, without adjustment for covariates and imputation of missing values the cost per QALY  
35  
36 363 was just cost-effective according to the threshold (ICER of 18,497 Euros/QALY).  
37  
38  
39  
40  
41  
42

43 364 Our results from the Base-case scenario contrast with findings in a recent systematic review<sup>27</sup>. The  
44  
45 365 review included four studies examining the cost-effectiveness of TKR compared to non-surgical  
46  
47 366 procedures and all four concluded that TKR was a cost-effective option. However, as opposed to  
48  
49 367 our study, none of the previous studies were based on a randomized trial. Two of the previous  
50  
51 368 studies used a Markov model to assess the long-term and lifetime cost-effectiveness of TKR<sup>28,29</sup>.  
52  
53 369 The remaining two were cohort-based studies examining short-term cost-effectiveness of TKR<sup>30,31</sup>.  
54  
55 370 A recent cohort-based cost-effectiveness analysis, not included in the systematic review, concluded  
56  
57 371 that TKR was not cost-effective at a group level over 8 years, while it would be cost-effective if it  
58  
59  
60

1  
2  
3  
4  
5  
6  
7  
8  
9  
10  
11  
12  
13  
14  
15  
16  
17  
18  
19  
20  
21  
22  
23  
24  
25  
26  
27  
28  
29  
30  
31  
32  
33  
34  
35  
36  
37  
38  
39  
40  
41  
42  
43  
44  
45  
46  
47  
48  
49  
50  
51  
52  
53  
54  
55  
56  
57  
58  
59  
60

372 was restricted to patients with more severe symptoms<sup>14</sup>. In contrast, we did not find that TKR was  
373 cost-effective in addition to non-surgical treatment in patients with more severe symptoms. Our  
374 study provides the first cost-effectiveness analysis of TKR in addition to non-surgical treatment  
375 using two comparable treatment groups, thereby providing an important addition to the above  
376 mentioned non-randomized studies.

377 One could argue that extending the time horizon might have led to a different conclusion. If the  
378 positive effect of the surgery persists beyond the 24 months, TKR plus non-surgical treatment might  
379 eventually end up being a cost-effective option. However, as indicated by a previous report<sup>32</sup>,  
380 improvements in symptoms might decline from 1 to 5 years after TKR, questioning the assumptions  
381 underlining a potential long-term cost-effectiveness of TKR. This is supported by the observed  
382 change in QALY over time in this trial. Both patients undergoing TKR plus non-surgical treatment  
383 and patients undergoing non-surgical treatment only experienced the greatest gain in QALYs from  
384 baseline to 3 months. The QALY remained stable until the 24 months follow-up in the TKR plus  
385 non-surgical group, while the non-surgical treatment only had a small (0.044) decrease in QALY. If  
386 TKR plus non-surgical treatment was to become cost-effective in the longer term, the decrease in  
387 QALY in the non-surgical group would need to continue. In the TKR plus non-surgical group, three  
388 people died during the period, while only one person died in the non-surgical group. When  
389 including the deaths in the analysis, TKR plus non-surgical treatment was still more effective than  
390 non-surgical treatment alone, though not as effective as in the primary analysis. This is because  
391 death corresponds to a QALY value of zero, thereby attenuating the effect of the surgery. The short  
392 time horizon and the different findings in the analysis without adjustment for covariates and  
393 imputation of missing values and the sub-analysis including deaths emphasize the susceptibility of  
394 the results and highlight the need for further analyses in the field.

## Strengths and limitations

All treatments, in particular surgical treatment, are associated with placebo effects<sup>33</sup>. As our study did not include a sham surgery control group, we were not able to evaluate the proportion of the 24 months treatment effects attributable to contextual factors<sup>34</sup>. Neither did we include a group receiving TKR without the non-surgical treatment, leaving us without the possibility of evaluating the additional effect and cost of the non-surgical treatment. Furthermore, as one of the exclusion criteria was mean pain the previous week above 60 mm on a 100-mm visual analogue scale, our results might not be generalizable to patients with more severe pain at baseline. However, 42% of the patients reported pain higher than 60 mm when asked about worst pain during the previous 24 hours and the mean pain intensity in our trial of 49 on a 0-100 worst to best scale is comparable to a range of previous clinical studies evaluating pain severity prior to TKR<sup>35-37</sup>. The study strengths include the highly comparable treatment groups as a result of the randomization and the use of data from the unique Danish registries, which comprise data deemed to be of high quality. Linkage between these registries and the Danish Civil Registration system allowed for retrieving data on an individual level, which is a unique feature of this study.

## CONCLUSIONS

1  
2  
3  
4  
5  
6  
7  
8  
9  
10  
11  
12  
13  
14  
15  
16  
17  
18  
19  
20  
21  
22  
23  
24  
25  
26  
27  
28  
29  
30  
31  
32  
33  
34  
35  
36  
37  
38  
39  
40  
41  
42  
43  
44  
45  
46  
47  
48  
49  
50  
51  
52  
53  
54  
55  
56  
57  
58  
59  
60

415 From a 24 months perspective, TKR plus non-surgical treatment is not cost-effective compared to  
416 non-surgical treatment alone in patients with moderate to severe osteoarthritis eligible for TKR.  
417 However, as TKR plus non-surgical treatment was just cost-effective when not adjusting for  
418 covariates and imputing missing values, further confirmatory studies with longer follow-up are  
419 needed.

## 421 **Acknowledgements**

422 We thank the orthopedic surgeons and other health care personnel from the Department of  
423 Orthopedic Surgery, Aalborg University Hospital, for their involvement in the recruitment of  
424 patients for the two studies; the Department of Occupational Therapy and Physiotherapy, Aalborg  
425 University Hospital, Denmark, for allowing us to use their facilities for the treatment and outcome  
426 assessments; project workers Anders Bundgaard Lind, Anders Norge Jensen, Anna Emilie Livbjerg,  
427 Dorte Rasmussen, Helle Mohr Brøcher, Henriette Duve, Janus Duus Christiansen, Josephine  
428 Nielsen, Kate Mcgirr, Lasse Lengsø, Lonneke Hjerimitslev, Malene Daugaard, Maria Helena  
429 Odefey, Mette Bøgedal, Mikkel Simonsen, Niels Balslev, Rikke Elholm Jensen, and Svend Lyhne  
430 for helping with administrative tasks, data collection, data entry, and treatment; Medical secretary  
431 Anette Fristrup for extracting data from hospital records; and Economist Ole Dahl, Aalborg  
432 University Hospital for extracting data on knee replacements from the National Patient Registry.  
433 Finally, the study funders and patients participating should be acknowledged, because without their  
434 participation, it would not have been possible to conduct the trials.

## 436 **Author contributions**

1  
2  
3  
4 437 **Study conception and design.** Skou, Kjellberg, Roos, Laursen, Arendt-Nielsen, Rasmussen,

5  
6  
7 438 Simonsen

8  
9 439 **Recruitment of patients:** Laursen, Simonsen.

10  
11 440 **Acquisition of data.** Skou, Kjellberg

12  
13 441 **Analysis and interpretation of data.** Skou, Kjellberg, Roos, Laursen, Arendt-Nielsen, Ibsen,

14  
15  
16 442 Larsen, Rasmussen, Simonsen

17  
18 443 **Drafting the article or revising it critically for important intellectual content.** Skou, Kjellberg,

19  
20 444 Roos, Laursen, Arendt-Nielsen, Ibsen, Larsen, Rasmussen, Simonsen

21  
22 445 **Final approval of the article.** Skou, Kjellberg, Roos, Laursen, Arendt-Nielsen, Ibsen, Larsen,

23  
24  
25 446 Rasmussen, Simonsen

26  
27 447 All authors had full access to all the data (including statistical reports and tables) in the study and

28  
29 448 take responsibility for the integrity of the data and the accuracy of the data analysis.

30  
31  
32 449

## 33 34 35 450 **Funding/Support**

36  
37  
38 451 The work was supported by The Danish Rheumatism Association, The Health Science Foundation

39  
40 452 of North Denmark Region, Obel Family Foundation, Foot Science International, Spar Nord

41  
42 453 Foundation, The Bevica Foundation, The Association of Danish Physiotherapists Research Fund,

43  
44 454 Medical Specialist Heinrich Kopp's Grant, and The Danish Medical Association Research Fund.

45  
46  
47 455 Dr. Skou is currently funded by a grant from the European Research Council (ERC) under the

48  
49 456 European Union's Horizon 2020 research and innovation program (grant agreement No 801790).

50  
51  
52 457

53  
54  
55 458

## 56 57 459 **Role of the Funder/Sponsor**

58

59

60



1  
2  
3  
4  
5  
6  
7  
8  
9  
10  
11  
12  
13  
14  
15  
16  
17  
18  
19  
20  
21  
22  
23  
24  
25  
26  
27  
28  
29  
30  
31  
32  
33  
34  
35  
36  
37  
38  
39  
40  
41  
42  
43  
44  
45  
46  
47  
48  
49  
50  
51  
52  
53  
54  
55  
56  
57  
58  
59  
60

460 The funders played no role in the design and conduct of the study; collection, management,  
461 analysis, and interpretation of the data; and preparation, review, or approval of the manuscript or  
462 decision to submit the manuscript for publication.

463

## 464 **Conflict of interest**

465 Dr. Roos is deputy editor of Osteoarthritis and Cartilage, the developer of the Knee injury and  
466 Osteoarthritis Outcome Score (KOOS) and several other freely available patient-reported outcome  
467 measures and co-founder of Good Life with Osteoarthritis in Denmark (GLA:D), a not-for profit  
468 initiative hosted by the University of Southern Denmark aimed at implementing clinical guidelines  
469 for osteoarthritis in clinical practice.

470 Dr. Skou is associate editor of Journal of Orthopaedic & Sports Physical Therapy, he has received  
471 grants from The Lundbeck Foundation, personal fees from Munksgaard, all outside the submitted  
472 work. He is co-founder of GLA:D, a not-for profit initiative hosted by the University of Southern  
473 Denmark aimed at implementing clinical guidelines for osteoarthritis in clinical practice.

474 Ms. Ibsen is partner in the company i2minds, who specialize in collecting, processing and analyzing  
475 data and information.

476 The authors report no other conflict of interest.

477

## 478 **Data sharing**

479 The data that support the findings of this study are available from Statistics Denmark but  
480 restrictions apply to the availability of these data, which were used under license for the current  
481 study, and so are not publicly available. Data are however available from the authors OS and ML  
482 upon reasonable request and with permission of Statistics Denmark.

1  
2  
3  
4 483  
5  
6  
7 484  
8  
9 485  
10  
11 486  
12  
13  
14 487  
15  
16 488  
17  
18 489  
19  
20 490  
21  
22  
23 491  
24  
25 492  
26  
27 493  
28  
29  
30 494  
31  
32 495  
33  
34 496  
35  
36 497  
37  
38  
39 498  
40  
41 499  
42  
43 500  
44  
45  
46 501  
47  
48 502  
49  
50 503  
51  
52  
53 504  
54  
55 505  
56  
57  
58  
59  
60

## REFERENCES

For peer review only

1  
2  
3  
4  
5  
6  
7  
8  
9  
10  
11  
12  
13  
14  
15  
16  
17  
18  
19  
20  
21  
22  
23  
24  
25  
26  
27  
28  
29  
30  
31  
32  
33  
34  
35  
36  
37  
38  
39  
40  
41  
42  
43  
44  
45  
46  
47  
48  
49  
50  
51  
52  
53  
54  
55  
56  
57  
58  
59  
60

1. Cross M, Smith E, Hoy D, et al. The global burden of hip and knee osteoarthritis: estimates from the global burden of disease 2010 study. *Annals of the Rheumatic Diseases* 2014;73:1323-30. doi: 10.1136/annrheumdis-2013-204763 [doi]
2. Peat G, McCarney R, Croft P. Knee pain and osteoarthritis in older adults: a review of community burden and current use of primary health care. *Annals of the Rheumatic Diseases* 2001;60:91-7.
3. Vos T, Flaxman AD, Naghavi M, et al. Years lived with disability (YLDs) for 1160 sequelae of 289 diseases and injuries 1990-2010: a systematic analysis for the Global Burden of Disease Study 2010. *Lancet* 2012;380:2163-96. doi: 10.1016/S0140-6736(12)61729-2 [doi]
4. Salmon JH, Rat AC, Sellam J, et al. Economic impact of lower-limb osteoarthritis worldwide: a systematic review of cost-of-illness studies. *Osteoarthritis Cartilage* 2016;24:1500-8. doi: 10.1016/j.joca.2016.03.012
5. Nguyen US, Zhang Y, Zhu Y, Niu J, Zhang B, Felson DT. Increasing prevalence of knee pain and symptomatic knee osteoarthritis: survey and cohort data. *Annals of Internal Medicine* 2011;155:725-32. doi: 10.1059/0003-4819-155-11-201112060-00004
6. Carr AJ, Robertsson O, Graves S, et al. Knee replacement. *Lancet* 2012;379:1331-40. doi: 10.1016/S0140-6736(11)60752-6
7. Nwachukwu BU, Bozic KJ, Schairer WW, et al. Current status of cost utility analyses in total joint arthroplasty: a systematic review. *Clin Orthop Relat Res* 2015;473:1815-27. doi: 10.1007/s11999-014-3964-4
8. Beswick AD, Wylde V, Gooberman-Hill R, Blom A, Dieppe P. What proportion of patients report long-term pain after total hip or knee replacement for osteoarthritis? A systematic review of prospective studies in unselected patients. *BMJ open* 2012;2:e000435. doi: 10.1136/bmjopen-2011-000435
9. Little AD, Judge A, Pandit H, Murray DW. Adverse outcomes after total and unicompartmental knee replacement in 101,330 matched patients: a study of data from the National Joint Registry for England and Wales. *Lancet* 2014;384:1437-45. doi: S0140-6736(14)60419-0 [pii]
10. Nelson AE, Allen KD, Golightly YM, Goode AP, Jordan JM. A systematic review of recommendations and guidelines for the management of osteoarthritis: The chronic osteoarthritis management initiative of the U.S. bone and joint initiative. *Seminars in arthritis and rheumatism* 2014;43:701-12. doi: 10.1016/j.semarthrit.2013.11.012 [doi]
11. Singh JA, Vessely MB, Harmsen WS, et al. A population-based study of trends in the use of total hip and total knee arthroplasty, 1969-2008. *Mayo Clinic proceedings* 2010;85:898-904. doi: 10.4065/mcp.2010.0115; 10.4065/mcp.2010.0115
12. National statistics on 152 Arthroplasty knee, HCUPnet, Healthcare Cost and Utilization Project. 2013. (Accessed Web Page, 2018, at <http://hcupnet.ahrq.gov/>.)
13. Skou ST, Roos EM, Laursen MB, et al. A Randomized, Controlled Trial of Total Knee Replacement. *The New England Journal of Medicine* 2015;373:1597-606.
14. Ferket BS, Feldman Z, Zhou J, Oei EH, Bierma-Zeinstra SM, Mazumdar M. Impact of total knee replacement practice: cost effectiveness analysis of data from the Osteoarthritis Initiative. *Bmj* 2017;356:j1131. doi: 10.1136/bmj.j1131
15. Husereau D, Drummond M, Petrou S, et al. Consolidated Health Economic Evaluation Reporting Standards (CHEERS) statement. *Bmj* 2013;346:f1049. doi: 10.1136/bmj.f1049
16. Skou ST, Roos EM, Laursen MB, et al. Total knee replacement plus physical and medical therapy or treatment with physical and medical therapy alone: A randomised controlled trial in patients with knee osteoarthritis (the MEDIC-study). *BMC musculoskeletal disorders* 2012;13:67. doi: 10.1186/1471-2474-13-67
17. Endres S. High-flexion versus conventional total knee arthroplasty: a 5-year study. *Journal of orthopaedic surgery (Hong Kong)* 2011;19:226-9.
18. Ageberg E, Link A, Roos EM. Feasibility of neuromuscular training in patients with severe hip or knee OA: the individualized goal-based NEMEX-TJR training program. *BMC musculoskeletal disorders* 2010;11:126. doi: 10.1186/1471-2474-11-126

1  
2  
3  
4  
5  
6  
7  
8  
9  
10  
11  
12  
13  
14  
15  
16  
17  
18  
19  
20  
21  
22  
23  
24  
25  
26  
27  
28  
29  
30  
31  
32  
33  
34  
35  
36  
37  
38  
39  
40  
41  
42  
43  
44  
45  
46  
47  
48  
49  
50  
51  
52  
53  
54  
55  
56  
57  
58  
59  
60

19. Christensen R, Bartels EM, Astrup A, Bliddal H. Effect of weight reduction in obese patients diagnosed with knee osteoarthritis: a systematic review and meta-analysis. *Annals of the Rheumatic Diseases* 2007;66:433-9. doi: 10.1136/ard.2006.065904
20. Miller WR, Rollnick S. *Motivational interviewing: preparing people for change*. New York: Guilford Press; 2002.
21. Ageberg E, Bennell KL, Hunt MA, Simic M, Roos EM, Creaby MW. Validity and inter-rater reliability of medio-lateral knee motion observed during a single-limb mini squat. *BMC musculoskeletal disorders* 2010;11:265. doi: 10.1186/1471-2474-11-265
22. Szende A, Williams A. *Measuring Self-Reported population Health: An International Perspective based on EQ-5D*. Budapest: SpringMed Publishing; 2004.
23. Wittrup-Jensen KU, Lauridsen J, Gudex C, Pedersen KM. Generation of a Danish TTO value set for EQ-5D health states. *Scandinavian Journal of Public Health* 2009;37:459-66. doi: 10.1177/1403494809105287 [doi]
24. National Institute for Health and Care Excellence (NICE). *Guide to the Methods of Technology Appraisal 2013*. London: National Institute for Health and Care Excellence (NICE); 2013.
25. Losina E, Paltiel AD, Weinstein AM, et al. Lifetime medical costs of knee osteoarthritis management in the United States: impact of extending indications for total knee arthroplasty. *Arthritis care & research* 2015;67:203-15. doi: 10.1002/acr.22412 [doi]
26. Skou ST, Roos EM, Laursen MB, et al. Total knee replacement and non-surgical treatment of knee osteoarthritis: 2-year outcome from two parallel randomized controlled trials. *Osteoarthritis and Cartilage* 2018;26:1170-80. doi: 10.1016/j.joca.2018.04.014
27. Kamaruzaman H, Kinghorn P, Oppong R. Cost-effectiveness of surgical interventions for the management of osteoarthritis: a systematic review of the literature. *BMC Musculoskeletal Disorders* 2017;18:183. doi: 10.1186/s12891-017-1540-2
28. Ruiz D, Jr., Koenig L, Dall TM, et al. The direct and indirect costs to society of treatment for end-stage knee osteoarthritis. *The Journal of bone and joint surgery American volume* 2013;95:1473-80. doi: 10.2106/jbjs.l.01488
29. Bedair H, Cha TD, Hansen VJ. Economic benefit to society at large of total knee arthroplasty in younger patients: a Markov analysis. *The Journal of bone and joint surgery American volume* 2014;96:119-26. doi: 10.2106/jbjs.l.01736
30. Waimann CA, Fernandez-Mazarambroz RJ, Cantor SB, et al. Cost-effectiveness of total knee replacement: a prospective cohort study. *Arthritis Care Res (Hoboken)* 2014;66:592-9. doi: 10.1002/acr.22186
31. Rasanen P, Paavolainen P, Sintonen H, et al. Effectiveness of hip or knee replacement surgery in terms of quality-adjusted life years and costs. *Acta Orthop* 2007;78:108-15. doi: 10.1080/17453670610013501
32. Nilsdotter AK, Toksvig-Larsen S, Roos EM. A 5 year prospective study of patient-relevant outcomes after total knee replacement. *Osteoarthritis and cartilage / OARS, Osteoarthritis Research Society* 2009;17:601-6. doi: 10.1016/j.joca.2008.11.007; 10.1016/j.joca.2008.11.007
33. Wartolowska K, Judge A, Hopewell S, et al. Use of placebo controls in the evaluation of surgery: systematic review. *BMJ (Clinical research ed)* 2014;348:g3253. doi: 10.1136/bmj.g3253 [doi]
34. Zou K, Wong J, Abdullah N, et al. Examination of overall treatment effect and the proportion attributable to contextual effect in osteoarthritis: meta-analysis of randomised controlled trials. *Ann Rheum Dis* 2016;75:7. doi: 10.1136/annrheumdis-2015-208387
35. Gossec L, Paternotte S, Maillefert JF, et al. The role of pain and functional impairment in the decision to recommend total joint replacement in hip and knee osteoarthritis: an international cross-sectional study of 1909 patients. Report of the OARSI-OMERACT Task Force on total joint replacement. *Osteoarthritis and cartilage / OARS, Osteoarthritis Research Society* 2011;19:147-54. doi: 10.1016/j.joca.2010.10.025

1  
2  
3  
4  
5  
6  
7  
8  
9  
10  
11  
12  
13  
14  
15  
16  
17  
18  
19  
20  
21  
22  
23  
24  
25  
26  
27  
28  
29  
30  
31  
32  
33  
34  
35  
36  
37  
38  
39  
40  
41  
42  
43  
44  
45  
46  
47  
48  
49  
50  
51  
52  
53  
54  
55  
56  
57  
58  
59  
60

36. Keurentjes JC, Fiocco M, So-Osman C, et al. Patients with severe radiographic osteoarthritis have a better prognosis in physical functioning after hip and knee replacement: a cohort-study. PLoS One 2013;8:e59500. doi: 10.1371/journal.pone.0059500

37. Wise BL, Niu J, Felson DT, et al. Functional Impairment Is a Risk Factor for Knee Replacement in the Multicenter Osteoarthritis Study. Clinical orthopaedics and related research 2015;473:2505-13. doi: 10.1007/s11999-015-4211-3 [doi]

For peer review only

## Figure legends

1  
2  
3  
4  
5  
6  
7  
8  
9  
10  
11  
12  
13  
14  
15  
16  
17  
18  
19  
20  
21  
22  
23  
24  
25  
26  
27  
28  
29  
30  
31  
32  
33  
34  
35  
36  
37  
38  
39  
40  
41  
42  
43  
44  
45  
46  
47  
48  
49  
50  
51  
52  
53  
54  
55  
56  
57  
58  
59  
60

638 **Fig 1. Flow of patients in the randomized controlled trial of patients eligible for total knee**  
639 **replacement. TKR=Total knee replacement; K-L score= Kellgren-Lawrence score; VAS=Visual**  
640 **Analogue Scale.**

For peer review only

1  
2  
3  
4  
5  
6  
7  
8  
9  
10  
11  
12  
13  
14  
15  
16  
17  
18  
19  
20  
21  
22  
23  
24  
25  
26  
27  
28  
29  
30  
31  
32  
33  
34  
35  
36  
37  
38  
39  
40  
41  
42  
43  
44  
45  
46  
47  
48  
49  
50  
51  
52  
53  
54  
55  
56  
57  
58  
59  
60652 **Tables**653 **Table 1. Baseline characteristics in the randomized controlled trial of patients eligible for total knee replacement (TKR)**

| Baseline characteristics                                 | TKR+non-surgical group<br>(n=50) | Non-surgical group<br>(n=50) |
|----------------------------------------------------------|----------------------------------|------------------------------|
| Women, n (%)                                             | 32 (64)                          | 30 (60)                      |
| Age (years), mean (SD)                                   | 65.8 (8.7)                       | 67.0 (8.7)                   |
| Body Mass Index, mean (SD)                               | 32.3 (6.2)                       | 32.0 (5.8)                   |
| Bilateral knee pain, n (%)                               | 18 (36)                          | 17 (34)                      |
| Radiographic knee OA severity (Kellgren-Lawrence), n (%) |                                  |                              |
| Grade 1                                                  | 0 (0)                            | 0 (0)                        |
| Grade 2                                                  | 7 (14)                           | 5 (10)                       |
| Grade 3                                                  | 21 (42)                          | 21 (42)                      |
| Grade 4                                                  | 22 (44)                          | 24 (48)                      |
| KOOS scores                                              |                                  |                              |
| Pain                                                     | 48.6 (17.5)                      | 49.5 (13.1)                  |
| Symptoms                                                 | 54.0 (15.0)                      | 58.3 (15.2)                  |
| ADL                                                      | 55.0 (17.0)                      | 53.5 (14.2)                  |
| Sport/Rec                                                | 18.0 (14.7)                      | 16.7 (15.1)                  |
| QOL                                                      | 32.3 (15.3)                      | 32.7 (13.3)                  |
| KOOS <sub>4</sub>                                        | 47.4 (13.4)                      | 48.5 (11.4)                  |
| Timed Up and Go test, seconds                            | 9.4 (2.4)                        | 8.6 (2.1)                    |
| 20-meter walk test, seconds                              | 13.4 (3.7)                       | 12.2 (2.6)                   |
| Used pain medication in the last week, yes n (%)         | 33 (67)                          | 29 (58)                      |

654 Radiographic severity: Radiographic knee osteoarthritis severity on the Kellgren-Lawrence scale; KOOS<sub>4</sub>: The mean score of four out of five of the  
655 Knee injury and Osteoarthritis Outcome Score subscales covering Pain, Symptoms, Function in daily living (ADL), Sport/Rec: Function in sport and  
656 recreation. and Quality of life (QOL), with scores ranging from 0 to 100 (worst to best scale).

**Table 2. Average health costs and public transfer income (measured as weeks) for the TKR plus non-surgical treatment group and the non-surgical treatment group prior to the study, at 1 and 2 follow up.**

| Health costs                  | Pre-period              |                     |         | Year 1 (0-12 months)    |                     |         | Year 2 (12-24 months)   |                     |         |
|-------------------------------|-------------------------|---------------------|---------|-------------------------|---------------------|---------|-------------------------|---------------------|---------|
|                               | TKR+non-surgical (N=50) | Non-surgical (N=50) | p value | TKR+non-surgical (N=50) | Non-surgical (N=50) | p-value | TKR+non-surgical (N=50) | Non-surgical (N=50) | p value |
|                               | €                       | €                   |         | €                       | €                   |         | €                       | €                   |         |
| Hospital sector               |                         |                     |         |                         |                     |         |                         |                     |         |
| Inpatient (incl. TKRs)        | 515                     | 546                 | 1.000   | 13,149                  | 4,016               | <0.001* | 3,845                   | 3,881               | 1.000   |
| Inpatient (excl. TKRs)        | 515                     | 546                 | 1.000   | 3,412                   | 1,515               | 0.980   | 3,436                   | 2,278               | 1.000   |
| Outpatient                    | 1,132                   | 1,234               | 1.000   | 2,035                   | 2,188               | 1.000   | 1,887                   | 2,772               | 1.000   |
| Primary sector, all           |                         |                     |         |                         |                     |         |                         |                     |         |
| General practitioner          | 448                     | 421                 | 1.000   | 454                     | 351                 | 0.550   | 382                     | 361                 | 1.000   |
| Medical specialist            | 270                     | 238                 | 1.000   | 325                     | 193                 | 0.010*  | 246                     | 201                 | 0.900   |
| Physiotherapy                 | 126                     | 122                 | 1.000   | 84                      | 91                  | 1.000   | 91                      | 90                  | 1.000   |
| Chiropractic                  | 37                      | 42                  | 1.000   | 24                      | 45                  | 0.980   | 25                      | 44                  | 1.000   |
| Lab work and other            | 3                       | 5                   | 1.000   | 5                       | 5                   | 1.000   | 6                       | 3                   | 1.000   |
| Other                         | 12                      | 14                  | 1.000   | 17                      | 18                  | 1.000   | 15                      | 24                  | 1.000   |
| Prescription medication, all  |                         |                     |         |                         |                     |         |                         |                     |         |
| Pain medication               | 599                     | 443                 | 1.000   | 704                     | 472                 | 0.950   | 620                     | 471                 | 1.000   |
| NSAID (N02B + M01A)           | 534                     | 377                 | 1.000   | 607                     | 382                 | 0.920   | 572                     | 403                 | 1.000   |
| Opioids (N02A)                | 65                      | 66                  | 1.000   | 97                      | 91                  | 1.000   | 48                      | 69                  | 1.000   |
| Other                         | 51                      | 50                  | 1.000   | 53                      | 66                  | 1.000   | 33                      | 52                  | 0.980   |
| Other                         | 13                      | 13                  | 1.000   | 45                      | 21                  | 0.250   | 14                      | 14                  | 1.000   |
| All health costs (incl. TKRs) | 2,695                   | 2,644               | 1.000   | 16,343                  | 7,028               | <0.001* | 6,733                   | 7,486               | 1.000   |
| All health costs (excl. TKRs) | 2,695                   | 2,644               | 1.000   | 6,606                   | 4,527               | 1.000   | 6,325                   | 5,882               | 1.000   |
| Public transfer income        |                         |                     |         |                         |                     |         |                         |                     |         |
|                               | Pre-period              |                     |         | Year 1 (0-12 months)    |                     |         | Year 2 (12-24 months)   |                     |         |
|                               | TKR+non-surgical        | Non-surgical        | p value | TKR+non-surgical        | Non-surgical        | p value | TKR+non-surgical        | Non-surgical        | p value |
|                               | Weeks                   | Weeks               |         | Weeks                   | Weeks               |         | Weeks                   | Weeks               |         |
| Observations (N)              | 19                      | 15                  |         | 19                      | 15                  |         | 19                      | 15                  |         |
| Total public transfer income  | 12.9                    | 9.2                 | 1.000   | 13.2                    | 9.1                 | 0.980   | 11.6                    | 6.8                 | 0.910   |
| Unemployment                  | 5.2                     | 1.0                 | 0.470   | 3.5                     | 0.5                 | 0.570   | 5.7                     | 0.2                 | 0.080   |
| Sick pay                      | 3.1                     | 0.0                 | 0.140   | 5.3                     | 0.7                 | 0.200   | 1.7                     | 0.8                 | 1.000   |
| Disability pension            | 0.9                     | 1.0                 | 1.000   | 1.0                     | 1.0                 | 1.000   | 1.0                     | 1.2                 | 1.000   |
| Early retirement              | 3.8                     | 7.1                 | 0.930   | 3.4                     | 6.9                 | 0.950   | 3.2                     | 4.7                 | 1.000   |

TKR=Total knee replacement. Significant differences ( $p<0.05$ ) are indicated with an asterisk.



672 **Table 3. Primary analysis excluding deaths. QALYs for the TKR plus non-surgical treatment group and the non-surgical treatment group at**  
 673 **baseline and at 3 months, 6 months, 12 months and 24 months follow-up.**

| QALY   | TKR+non-surgical group |          |          |           |           |                        | Non-surgical group |          |          |           |           |                        |
|--------|------------------------|----------|----------|-----------|-----------|------------------------|--------------------|----------|----------|-----------|-----------|------------------------|
|        | Baseline               | 3 months | 6 months | 12 months | 24 months | 24 months (discounted) | Baseline           | 3 months | 6 months | 12 months | 24 months | 24 months (discounted) |
| Mean   | 0.658                  | 0.848    | 0.866    | 0.858     | 0.878     | 0.853                  | 0.680              | 0.780    | 0.755    | 0.795     | 0.758     | 0.736                  |
| SD     | 0.160                  | 0.145    | 0.141    | 0.180     | 0.155     | 0.151                  | 0.148              | 0.118    | 0.158    | 0.153     | 0.199     | 0.193                  |
| Median | 0.723                  | 0.824    | 0.824    | 0.919     | 1.000     | 0.971                  | 0.723              | 0.776    | 0.776    | 0.776     | 0.776     | 0.753                  |
| 25th   | 0.655                  | 0.776    | 0.776    | 0.774     | 0.723     | 0.702                  | 0.655              | 0.723    | 0.718    | 0.723     | 0.723     | 0.702                  |
| 75th   | 0.723                  | 1.000    | 1.000    | 1.000     | 1.000     | 0.971                  | 0.771              | 0.824    | 0.824    | 1.000     | 0.838     | 0.814                  |
| N      | 47                     | 39       | 41       | 41        | 43        | 43                     | 49                 | 45       | 48       | 48        | 47        | 47                     |

674 TKR=Total knee replacement; QALY= quality-adjusted life-years; discounted= i.e. future QALY value converted to present QALY value.

675 **Table 4. Primary analysis excluding deaths. Incremental cost-effectiveness ratios (ICERs) and probability of cost-effectiveness of TKR plus**  
 676 **non-surgical treatment vs non-surgical treatment alone for each scenario.**

| Analysis   | Incremental cost | 95% CI          | Incremental effect | 95% CI         | ICER     | Probability of cost-effectiveness at € 22,665 |
|------------|------------------|-----------------|--------------------|----------------|----------|-----------------------------------------------|
|            | €                |                 | QALY               |                | € / QALY | %                                             |
| Base-case  | 6,070            | 1,857 to 10,283 | 0.186              | 0.078 to 0.294 | 32,611   | 23.2                                          |
| Scenario 1 | 4,640            | -200 to 9,480   | 0.233              | 0.088 to 0.378 | 19,917   | 58.3                                          |
| Scenario 2 | 4,481            | -668 to 9,629   | 0.242              | 0.095 to 0.390 | 18,497   | 61.9                                          |

677 TKR=Total knee replacement; QALY=quality-adjusted life-years; 95% CI=95% confidence interval

678 Base-case=Adjusted for age, sex and baseline value

679 Scenario 1=unadjusted; Scenario 2=unadjusted and without imputation of missing values

680 **Table 5. Sub-analysis including deaths. QALYs for TKR plus non-surgical treatment vs non-surgical treatment alone at baseline and at 3**  
 681 **months, 6 months, 12 months and 24 months follow-up.**

| QALY   | TKR+non-surgical group |          |          |           |           |                        | Non-surgical group |          |          |           |           |                        |
|--------|------------------------|----------|----------|-----------|-----------|------------------------|--------------------|----------|----------|-----------|-----------|------------------------|
|        | Baseline               | 3 months | 6 months | 12 months | 24 months | 24 months (discounted) | Baseline           | 3 months | 6 months | 12 months | 24 months | 24 months (discounted) |
| Mean   | 0.661                  | 0.845    | 0.865    | 0.861     | 0.821     | 0.797                  | 0.681              | 0.780    | 0.757    | 0.795     | 0.742     | 0.721                  |
| SD     | 0.156                  | 0.145    | 0.139    | 0.177     | 0.266     | 0.258                  | 0.147              | 0.117    | 0.157    | 0.151     | 0.225     | 0.219                  |
| Median | 0.723                  | 0.824    | 0.824    | 0.919     | 1.000     | 0.971                  | 0.723              | 0.776    | 0.776    | 0.776     | 0.776     | 0.753                  |
| 25th   | 0.655                  | 0.750    | 0.776    | 0.776     | 0.723     | 0.702                  | 0.655              | 0.723    | 0.723    | 0.723     | 0.723     | 0.701                  |
| 75th   | 0.723                  | 1.000    | 1.000    | 1.000     | 1.000     | 0.971                  | 0.771              | 0.824    | 0.824    | 1.000     | 0.831     | 0.807                  |
| N      | 50                     | 40       | 42       | 46        | 46        | 46                     | 50                 | 46       | 49       | 49        | 48        | 48                     |

682 TKR=Total knee replacement; QALY=quality-adjusted life-years; discounted= i.e. future QALY value converted to present QALY value.

**Table 6. Sub-analysis including deaths. Incremental cost-effectiveness ratios (ICERs) and probability of cost-effectiveness of TKR plus non-surgical treatment vs non-surgical treatment alone for each scenario.**

| Analysis   | Incremental cost | 95% CI          | Incremental effect | 95% CI          | ICER     | Probability of cost-effectiveness at € 22,665 |
|------------|------------------|-----------------|--------------------|-----------------|----------|-----------------------------------------------|
|            | €                |                 | QALY               |                 | € / QALY | %                                             |
| Base-case  | 7,880            | 2,894 to 12,867 | 0.123              | -0.011 to 0.257 | 64,208   | 7.8                                           |
| Scenario 1 | 8,585            | 2,442 to 14,728 | 0.178              | 0.011 to 0.346  | 48,128   | 12.4                                          |
| Scenario 2 | 8,805            | 2,201 to 15,409 | 0.190              | 0.023 to 0.357  | 46,277   | 13.8                                          |

TKR=Total knee replacement; QALY=quality-adjusted life-years; 95% CI=95% confidence interval

Base-case=QALY adjusted for age, sex and baseline value

Scenario 1=unadjusted; Scenario 2=unadjusted and without imputation of missing values

Dominated=Non-surgical treatment alone was both more effective and less costly than TKR plus non-surgical treatment

## Supporting information captions

**S1.** Completed CONSORT Checklist

**S2.** Published study protocol

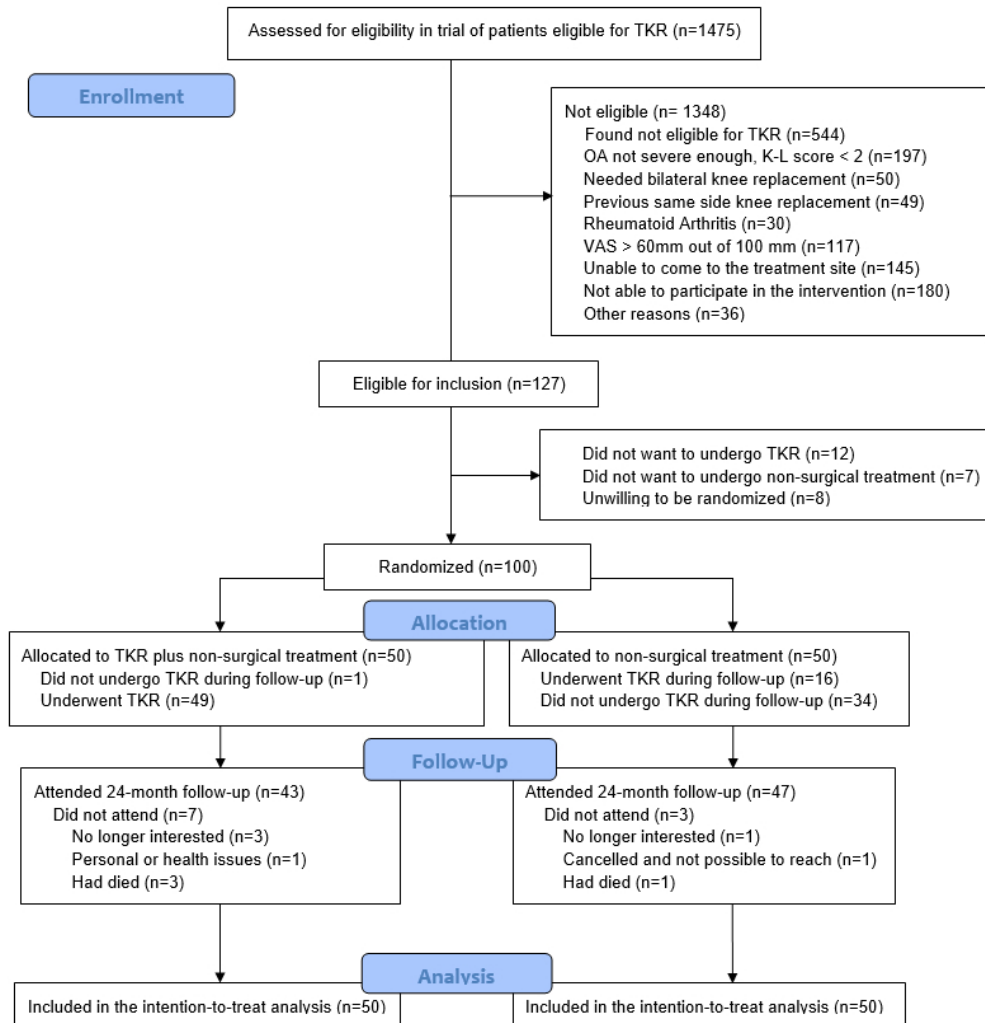

Fig 1. Flow of patients in the randomized controlled trial of patients eligible for total knee replacement. TKR=Total knee replacement; K-L score= Kellgren-Lawrence score; VAS=Visual Analogue Scale.

208x215mm (96 x 96 DPI)

**CHEERS Checklist**

**Items to include when reporting economic evaluations of health interventions**

The **ISPOR CHEERS Task Force Report**, *Consolidated Health Economic Evaluation Reporting Standards (CHEERS)—Explanation and Elaboration: A Report of the ISPOR Health Economic Evaluations Publication Guidelines Good Reporting Practices Task Force*, provides examples and further discussion of the 24-item CHEERS Checklist and the CHEERS Statement. It may be accessed via the *Value in Health* or via the ISPOR Health Economic Evaluation Publication Guidelines – CHEERS: Good Reporting Practices webpage: <http://www.ispor.org/TaskForces/EconomicPubGuidelines.asp>

| Section/item                    | Item No | Recommendation                                                                                                                                                                             | Reported on page No/line No |
|---------------------------------|---------|--------------------------------------------------------------------------------------------------------------------------------------------------------------------------------------------|-----------------------------|
| <b>Title and abstract</b>       |         |                                                                                                                                                                                            |                             |
| Title                           | 1       | Identify the study as an economic evaluation or use more specific terms such as “cost-effectiveness analysis”, and describe the interventions compared.                                    | 1                           |
| Abstract                        | 2       | Provide a structured summary of objectives, perspective, setting, methods (including study design and inputs), results (including base case and uncertainty analyses), and conclusions.    | 2                           |
| <b>Introduction</b>             |         |                                                                                                                                                                                            |                             |
| Background and objectives       | 3       | Provide an explicit statement of the broader context for the study.<br>Present the study question and its relevance for health policy or practice decisions.                               | 4                           |
| <b>Methods</b>                  |         |                                                                                                                                                                                            |                             |
| Target population and subgroups | 4       | Describe characteristics of the base case population and subgroups analysed, including why they were chosen.                                                                               | 6-7                         |
| Setting and location            | 5       | State relevant aspects of the system(s) in which the decision(s) need(s) to be made.                                                                                                       | 7                           |
| Study perspective               | 6       | Describe the perspective of the study and relate this to the costs being evaluated.                                                                                                        | 6-7                         |
| Comparators                     | 7       | Describe the interventions or strategies being compared and state why they were chosen.                                                                                                    | 7-9                         |
| Time horizon                    | 8       | State the time horizon(s) over which costs and consequences are being evaluated and say why appropriate.                                                                                   | 7                           |
| Discount rate                   | 9       | Report the choice of discount rate(s) used for costs and outcomes and say why appropriate.                                                                                                 | 13                          |
| Choice of health outcomes       | 10      | Describe what outcomes were used as the measure(s) of benefit in the evaluation and their relevance for the type of analysis performed.                                                    | 11                          |
| Measurement of effectiveness    | 11a     | <i>Single study-based estimates:</i> Describe fully the design features of the single effectiveness study and why the single study was a sufficient source of clinical effectiveness data. | 4+6                         |

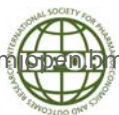

|    |                         |     |                                                                                                                                                                                                                                                                                                                                                       |       |
|----|-------------------------|-----|-------------------------------------------------------------------------------------------------------------------------------------------------------------------------------------------------------------------------------------------------------------------------------------------------------------------------------------------------------|-------|
| 1  |                         | 11b | <i>Synthesis-based estimates:</i> Describe fully the methods used for identification of included studies and synthesis of clinical effectiveness data.                                                                                                                                                                                                | N/A   |
| 2  |                         |     |                                                                                                                                                                                                                                                                                                                                                       |       |
| 3  |                         |     |                                                                                                                                                                                                                                                                                                                                                       |       |
| 4  | Measurement and         | 12  | If applicable, describe the population and methods used to elicit preferences for outcomes.                                                                                                                                                                                                                                                           | N/A   |
| 5  | valuation of preference |     |                                                                                                                                                                                                                                                                                                                                                       |       |
| 6  | based outcomes          |     |                                                                                                                                                                                                                                                                                                                                                       |       |
| 7  |                         |     |                                                                                                                                                                                                                                                                                                                                                       |       |
| 8  | Estimating resources    | 13a | <i>Single study-based economic evaluation:</i> Describe approaches used to estimate resource use associated with the alternative interventions. Describe primary or secondary research methods for valuing each resource item in terms of its unit cost. Describe any adjustments made to approximate to opportunity costs.                           | 9-11  |
| 9  | and costs               |     |                                                                                                                                                                                                                                                                                                                                                       |       |
| 10 |                         |     |                                                                                                                                                                                                                                                                                                                                                       |       |
| 11 |                         |     |                                                                                                                                                                                                                                                                                                                                                       |       |
| 12 |                         |     |                                                                                                                                                                                                                                                                                                                                                       |       |
| 13 |                         |     |                                                                                                                                                                                                                                                                                                                                                       |       |
| 14 |                         |     |                                                                                                                                                                                                                                                                                                                                                       |       |
| 15 |                         | 13b | <i>Model-based economic evaluation:</i> Describe approaches and data sources used to estimate resource use associated with model health states. Describe primary or secondary research methods for valuing each resource item in terms of its unit cost. Describe any adjustments made to approximate to opportunity costs.                           | N/A   |
| 16 |                         |     |                                                                                                                                                                                                                                                                                                                                                       |       |
| 17 |                         |     |                                                                                                                                                                                                                                                                                                                                                       |       |
| 18 |                         |     |                                                                                                                                                                                                                                                                                                                                                       |       |
| 19 |                         |     |                                                                                                                                                                                                                                                                                                                                                       |       |
| 20 |                         |     |                                                                                                                                                                                                                                                                                                                                                       |       |
| 21 |                         |     |                                                                                                                                                                                                                                                                                                                                                       |       |
| 22 | Currency, price date,   | 14  | Report the dates of the estimated resource quantities and unit costs. Describe methods for adjusting estimated unit costs to the year of reported costs if necessary. Describe methods for converting costs into a common currency base and the exchange rate.                                                                                        | 7+10  |
| 23 | and conversion          |     |                                                                                                                                                                                                                                                                                                                                                       |       |
| 24 |                         |     |                                                                                                                                                                                                                                                                                                                                                       |       |
| 25 |                         |     |                                                                                                                                                                                                                                                                                                                                                       |       |
| 26 |                         |     |                                                                                                                                                                                                                                                                                                                                                       |       |
| 27 |                         |     |                                                                                                                                                                                                                                                                                                                                                       |       |
| 28 | Choice of model         | 15  | Describe and give reasons for the specific type of decision-analytical model used. Providing a figure to show model structure is strongly recommended.                                                                                                                                                                                                | 12-13 |
| 29 |                         |     |                                                                                                                                                                                                                                                                                                                                                       |       |
| 30 |                         |     |                                                                                                                                                                                                                                                                                                                                                       |       |
| 31 | Assumptions             | 16  | Describe all structural or other assumptions underpinning the decision-analytical model.                                                                                                                                                                                                                                                              | 12-13 |
| 32 |                         |     |                                                                                                                                                                                                                                                                                                                                                       |       |
| 33 |                         |     |                                                                                                                                                                                                                                                                                                                                                       |       |
| 34 | Analytical methods      | 17  | Describe all analytical methods supporting the evaluation. This could include methods for dealing with skewed, missing, or censored data; extrapolation methods; methods for pooling data; approaches to validate or make adjustments (such as half cycle corrections) to a model; and methods for handling population heterogeneity and uncertainty. | 12-13 |
| 35 |                         |     |                                                                                                                                                                                                                                                                                                                                                       |       |
| 36 |                         |     |                                                                                                                                                                                                                                                                                                                                                       |       |
| 37 |                         |     |                                                                                                                                                                                                                                                                                                                                                       |       |
| 38 |                         |     |                                                                                                                                                                                                                                                                                                                                                       |       |
| 39 |                         |     |                                                                                                                                                                                                                                                                                                                                                       |       |
| 40 |                         |     |                                                                                                                                                                                                                                                                                                                                                       |       |
| 41 |                         |     |                                                                                                                                                                                                                                                                                                                                                       |       |
| 42 | <b>Results</b>          |     |                                                                                                                                                                                                                                                                                                                                                       |       |
| 43 | Study parameters        | 18  | Report the values, ranges, references, and, if used, probability distributions for all parameters. Report reasons or sources for distributions used to represent uncertainty where appropriate. Providing a table to show the input values is strongly recommended.                                                                                   | 14-16 |
| 44 |                         |     |                                                                                                                                                                                                                                                                                                                                                       |       |
| 45 |                         |     |                                                                                                                                                                                                                                                                                                                                                       |       |
| 46 |                         |     |                                                                                                                                                                                                                                                                                                                                                       |       |
| 47 |                         |     |                                                                                                                                                                                                                                                                                                                                                       |       |
| 48 |                         |     |                                                                                                                                                                                                                                                                                                                                                       |       |
| 49 | Incremental costs and   | 19  | For each intervention, report mean values for the main categories of estimated costs and outcomes of interest, as well as mean differences between the comparator groups. If applicable, report incremental cost-effectiveness ratios.                                                                                                                | 14-16 |
| 50 | outcomes                |     |                                                                                                                                                                                                                                                                                                                                                       |       |
| 51 |                         |     |                                                                                                                                                                                                                                                                                                                                                       |       |
| 52 |                         |     |                                                                                                                                                                                                                                                                                                                                                       |       |
| 53 | Characterising          | 20a | <i>Single study-based economic evaluation:</i> Describe the effects of sampling uncertainty for the estimated incremental cost and incremental effectiveness parameters, together with the impact                                                                                                                                                     |       |
| 54 | uncertainty             |     |                                                                                                                                                                                                                                                                                                                                                       |       |
| 55 |                         |     |                                                                                                                                                                                                                                                                                                                                                       |       |
| 56 |                         |     |                                                                                                                                                                                                                                                                                                                                                       |       |
| 57 |                         |     |                                                                                                                                                                                                                                                                                                                                                       |       |
| 58 |                         |     |                                                                                                                                                                                                                                                                                                                                                       |       |
| 59 |                         |     |                                                                                                                                                                                                                                                                                                                                                       |       |
| 60 |                         |     |                                                                                                                                                                                                                                                                                                                                                       |       |

|                                                                      |     |                                                                                                                                                                                                                                                                            |       |
|----------------------------------------------------------------------|-----|----------------------------------------------------------------------------------------------------------------------------------------------------------------------------------------------------------------------------------------------------------------------------|-------|
|                                                                      |     | of methodological assumptions (such as discount rate, study perspective).                                                                                                                                                                                                  | 14-16 |
|                                                                      | 20b | <i>Model-based economic evaluation</i> : Describe the effects on the results of uncertainty for all input parameters, and uncertainty related to the structure of the model and assumptions.                                                                               | N/A   |
| Characterising heterogeneity                                         | 21  | If applicable, report differences in costs, outcomes, or cost-effectiveness that can be explained by variations between subgroups of patients with different baseline characteristics or other observed variability in effects that are not reducible by more information. | 16    |
| <b>Discussion</b>                                                    |     |                                                                                                                                                                                                                                                                            |       |
| Study findings, limitations, generalisability, and current knowledge | 22  | Summarise key study findings and describe how they support the conclusions reached. Discuss limitations and the generalisability of the findings and how the findings fit with current knowledge.                                                                          | 17-19 |
| <b>Other</b>                                                         |     |                                                                                                                                                                                                                                                                            |       |
| Source of funding                                                    | 23  | Describe how the study was funded and the role of the funder in the identification, design, conduct, and reporting of the analysis. Describe other non-monetary sources of support.                                                                                        | 21-22 |
| Conflicts of interest                                                | 24  | Describe any potential for conflict of interest of study contributors in accordance with journal policy. In the absence of a journal policy, we recommend authors comply with International Committee of Medical Journal Editors recommendations.                          | 21-22 |

For consistency, the CHEERS Statement checklist format is based on the format of the CONSORT statement checklist

The **ISPOR CHEERS Task Force Report** provides examples and further discussion of the 24-item CHEERS Checklist and the CHEERS Statement. It may be accessed via the *Value in Health* link or via the ISPOR Health Economic Evaluation Publication Guidelines – CHEERS: Good Reporting Practices webpage: <http://www.ispor.org/TaskForces/EconomicPubGuidelines.asp>

The citation for the CHEERS Task Force Report is:

Husereau D, Drummond M, Petrou S, et al. Consolidated health economic evaluation reporting standards (CHEERS)—Explanation and elaboration: A report of the ISPOR health economic evaluations publication guidelines good reporting practices task force. *Value Health* 2013;16:231-50.



# BMJ Open

## Cost-effectiveness of total knee replacement in addition to non-surgical treatment: 2-year outcome from a randomized trial in secondary care in Denmark

|                                 |                                                                                                                                                                                                                                                                                                                                                                                                                                                                                                                                                                                                                                                                                                                                                                                                                                                                                                            |
|---------------------------------|------------------------------------------------------------------------------------------------------------------------------------------------------------------------------------------------------------------------------------------------------------------------------------------------------------------------------------------------------------------------------------------------------------------------------------------------------------------------------------------------------------------------------------------------------------------------------------------------------------------------------------------------------------------------------------------------------------------------------------------------------------------------------------------------------------------------------------------------------------------------------------------------------------|
| Journal:                        | <i>BMJ Open</i>                                                                                                                                                                                                                                                                                                                                                                                                                                                                                                                                                                                                                                                                                                                                                                                                                                                                                            |
| Manuscript ID                   | bmjopen-2019-033495.R1                                                                                                                                                                                                                                                                                                                                                                                                                                                                                                                                                                                                                                                                                                                                                                                                                                                                                     |
| Article Type:                   | Original research                                                                                                                                                                                                                                                                                                                                                                                                                                                                                                                                                                                                                                                                                                                                                                                                                                                                                          |
| Date Submitted by the Author:   | 14-Nov-2019                                                                                                                                                                                                                                                                                                                                                                                                                                                                                                                                                                                                                                                                                                                                                                                                                                                                                                |
| Complete List of Authors:       | Skou, Søren; Syddansk Universitet, Research Unit for Musculoskeletal Function and Physiotherapy, Department of Sports Science and Clinical Biomechanics; Næstved-Slagelse-Ringsted Hospitals, Region Zealand, Department of Physiotherapy and Occupational Therapy<br>Roos, Ewa; Syddansk Universitet Det Sundhedsvidenskabelige Fakultet, Sports Science and Clinical Biomechanics<br>Laursen, Mogens; Aalborg University Hospital; Aalborg Universitet, Department of Clinical Medicine<br>Arendt-Nielsen, Lars; Aalborg University, Department of Health Science and Technology<br>Rasmussen, Sten; Aalborg University Hospital; Aalborg University, Department of Clinical Medicine<br>Simonsen, Ole; Aalborg University Hospital, Orthopedic Surgery Research Unit; Aalborg Universitet, Department of Clinical Medicine<br>Ibsen, Rikke; I2minds<br>Larsen, Arendse ; VIVE<br>Kjellberg, Jakob; VIVE |
| <b>Primary Subject Heading</b>: | Surgery                                                                                                                                                                                                                                                                                                                                                                                                                                                                                                                                                                                                                                                                                                                                                                                                                                                                                                    |
| Secondary Subject Heading:      | Health economics                                                                                                                                                                                                                                                                                                                                                                                                                                                                                                                                                                                                                                                                                                                                                                                                                                                                                           |
| Keywords:                       | Osteoarthritis, THERAPEUTICS, Randomized controlled trial, Knee Replacement, Medical economics                                                                                                                                                                                                                                                                                                                                                                                                                                                                                                                                                                                                                                                                                                                                                                                                             |
|                                 |                                                                                                                                                                                                                                                                                                                                                                                                                                                                                                                                                                                                                                                                                                                                                                                                                                                                                                            |

SCHOLARONE™  
Manuscripts

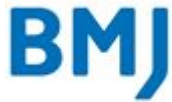

I, the Submitting Author has the right to grant and does grant on behalf of all authors of the Work (as defined in the below author licence), an exclusive licence and/or a non-exclusive licence for contributions from authors who are: i) UK Crown employees; ii) where BMJ has agreed a CC-BY licence shall apply, and/or iii) in accordance with the terms applicable for US Federal Government officers or employees acting as part of their official duties; on a worldwide, perpetual, irrevocable, royalty-free basis to BMJ Publishing Group Ltd ("BMJ") its licensees and where the relevant Journal is co-owned by BMJ to the co-owners of the Journal, to publish the Work in this journal and any other BMJ products and to exploit all rights, as set out in our [licence](#).

The Submitting Author accepts and understands that any supply made under these terms is made by BMJ to the Submitting Author unless you are acting as an employee on behalf of your employer or a postgraduate student of an affiliated institution which is paying any applicable article publishing charge ("APC") for Open Access articles. Where the Submitting Author wishes to make the Work available on an Open Access basis (and intends to pay the relevant APC), the terms of reuse of such Open Access shall be governed by a Creative Commons licence – details of these licences and which [Creative Commons](#) licence will apply to this Work are set out in our licence referred to above.

Other than as permitted in any relevant BMJ Author's Self Archiving Policies, I confirm this Work has not been accepted for publication elsewhere, is not being considered for publication elsewhere and does not duplicate material already published. I confirm all authors consent to publication of this Work and authorise the granting of this licence.



1  
2  
3  
4 1 **Cost-effectiveness of total knee replacement in addition to non-surgical treatment: 2-year**  
5 **outcome from a randomized trial in secondary care in Denmark**  
6  
7

8 3 Søren T. Skou<sup>1, 2, 3, 4</sup>; Ewa M. Roos<sup>2</sup>; Mogens Laursen<sup>1,4,5</sup>; Lars Arendt-Nielsen<sup>4</sup>; Sten  
9 4 Rasmussen<sup>1,4,5</sup>; Ole Simonsen<sup>1,4,5</sup>; Rikke Ibsen<sup>6</sup>; Arendse Tange Larsen<sup>7</sup>; Jakob Kjellberg<sup>7</sup>

10 5 <sup>1</sup> Orthopedic Surgery Research Unit, Aalborg University Hospital, 9000 Aalborg, Denmark  
11

12 6 <sup>2</sup> Research Unit for Musculoskeletal Function and Physiotherapy, Department of Sports Science and  
13 7 Clinical Biomechanics, University of Southern Denmark, 5230 Odense, Denmark  
14

15 8 <sup>3</sup> Department of Physiotherapy and Occupational Therapy, Næstved-Slagelse-Ringsted Hospitals,  
16 9 Region Zealand, 4200 Slagelse, Denmark  
17

18 10 <sup>4</sup> Center for Sensory-Motor Interaction (SMI), Department of Health Science and Technology,  
19 11 Faculty of Medicine, Aalborg University, 9220 Aalborg, Denmark  
20

21 12 <sup>5</sup> Department of Clinical Medicine, Aalborg University, 9220 Aalborg, Denmark  
22

23 13 <sup>6</sup> I2minds, 8000 Aarhus, Denmark  
24

25 14 <sup>7</sup> VIVE – The Danish Centre of Applied Social Science, 1152 Copenhagen, Denmark  
26

27 15 **Original manuscript for BMJ Open**  
28

29 16 **Corresponding Author:**  
30

31 17 STS: [stskou@health.sdu.dk](mailto:stskou@health.sdu.dk) ; +4523708640  
32

33 18 Research Unit for Musculoskeletal Function and Physiotherapy, Department of Sports Science and  
34 19 Clinical Biomechanics, University of Southern Denmark; 55 Campusvej; DK-5230 Odense M  
35 20  
36

37 21 Manuscript: 4,099 words; Abstract: 300 words  
38

39 22 **Running headline:** Cost-effectiveness of knee replacement in knee osteoarthritis  
40  
41  
42  
43  
44  
45  
46  
47  
48  
49  
50  
51  
52  
53  
54  
55  
56  
57  
58  
59  
60

1  
2  
3  
4  
5  
6  
7  
8  
9  
10  
11  
12  
13  
14  
15  
16  
17  
18  
19  
20  
21  
22  
23  
24  
25  
26  
27  
28  
29  
30  
31  
32  
33  
34  
35  
36  
37  
38  
39  
40  
41  
42  
43  
44  
45  
46  
47  
48  
49  
50  
51  
52  
53  
54  
55  
56  
57  
58  
59  
60

## 25 Abstract

26 **Objective:** To assess the 24-month cost-effectiveness of total knee replacement (TKR) plus non-  
27 surgical treatment compared to non-surgical treatment with the option of later TKR if needed.

28 **Methods:** 100 adults with moderate to severe knee osteoarthritis found eligible for TKR by an  
29 orthopedic surgeon in secondary care were randomized to TKR plus 12 weeks of supervised non-  
30 surgical treatment (exercise, education, diet, insoles and pain medication) or to supervised non-  
31 surgical treatment alone. Including quality-adjusted life years (QALYs) data from baseline, 3, 6, 12  
32 and 24 months, effectiveness was measured as change at 24 months. Healthcare costs and transfer  
33 payments were derived from national registries. Incremental health care costs, and incremental cost-  
34 effectiveness ratios (ICERs) were calculated. A probabilistic sensitivity analysis was conducted and  
35 the probability of cost-effectiveness was estimated at the 22,665 Euros/QALY threshold defined by  
36 the National Institute for Health and Care Excellence.

37 **Results:** TKR plus non-surgical treatment was more expensive (mean of 23,076 vs. 14,514 Euros)  
38 but also more effective than non-surgical treatment. (mean 24-month improvement in QALY of  
39 0.195 vs. 0.056). While cost-effective in the unadjusted scenario (ICER of 18,497 Euros/QALY),  
40 TKR plus non-surgical treatment was not cost-effective compared to non-surgical treatment with  
41 the option of later TKR if needed in the adjusted (age, sex and baseline values), base-case scenario  
42 (ICER of 32,611 Euros/QALY) with a probability of cost-effectiveness of 23.2%. Including deaths,  
43 TKR plus non-surgical treatment was still not cost-effective (ICERs of 46,277 to 64,208  
44 Euros/QALY).

45 **Conclusions:** From a 24-month perspective, TKR plus non-surgical treatment does not appear to be  
46 cost-effective compared to non-surgical treatment with the option of later TKR if needed. in

1  
2  
3  
4 47 patients with moderate to severe knee osteoarthritis and moderate intensity pain in secondary care in  
5  
6 48 Denmark. Results were sensitive to changes, highlighting the need for further confirmatory  
7  
8  
9 49 research also assessing the long-term cost-effectiveness of TKR.  
10  
11

12 50 **Trial registration:** ClinicalTrials.gov (NCT01410409).  
13  
14

15 51 **Keywords:** Osteoarthritis; Therapeutics; Randomized controlled trial; Knee Replacement; Medical  
16  
17 52 economics  
18  
19  
20  
21 53

## 24 54 **Strengths and limitations of this study**

- 28 55 • This is the first economic evaluation of total knee replacement that is based on a randomized  
29 56 trial of surgical and non-surgical treatment thereby providing highly comparable treatment  
30 57 groups assessed and treated in a standardized and controlled setup.
- 35 58 • Cost data were retrieved from the Danish health registries which contain detailed, high-quality  
36 59 information on health sector costs, social costs, and prescription medication on individual  
37 60 patients, and effectiveness data were systematically and rigorously collected in the randomized  
38 61 trial.
- 45 62 • The 24-month time horizon and the selected population included limit conclusions on the long-  
46 63 term cost-effectiveness of total knee replacement and the generalizability to other populations
- 49 64 • Since nearly 1 out of 3 from the non-surgical group had TKR surgery during the 24 months, it is  
50 65 likely that the true additional effect and cost of TKR in addition to non-surgical treatment have  
51 66 been underestimated in the study.  
52 67  
53  
54  
55  
56  
57  
58  
59  
60

## INTRODUCTION

Knee osteoarthritis (OA) is one of the leading contributors to the global burden of disease<sup>1</sup> with considerable pain and functional limitations for the individual<sup>2</sup>. The disease has been estimated to affect 250 million people worldwide<sup>3</sup>, with total European costs estimated to be 817 billion Euros per year<sup>4</sup>. Over the last 20 years, the prevalence of knee OA has increased substantially<sup>5</sup> and is expected to continue to increase<sup>1</sup> and amplify the societal burden.

In patients with end-stage knee OA, total knee replacement (TKR) is considered an effective<sup>6</sup> and cost-effective<sup>7</sup> treatment. However, approximately 20% continue to have chronic pain after otherwise successful surgery<sup>8</sup> and, in addition, the procedure is associated with a risk of serious adverse events<sup>9</sup>. Furthermore, clinical guidelines reflecting high-quality evidence from recent decades highlight non-surgical treatments as an effective and less costly treatment for patients with knee OA<sup>10</sup>. As the number of TKR procedures performed each year has increased dramatically since the 1970s<sup>11</sup>, with around 600,000 annual procedures in the United States alone<sup>12</sup>, evidence of the effectiveness and cost-effectiveness of TKR in comparison to non-surgical treatments is warranted<sup>7</sup>.

In 2015, a randomized trial assessing the effectiveness of TKR plus non-surgical treatment as compared with non-surgical treatment alone was published<sup>13</sup>. Being the first of its kind, the study provided high-quality evidence on the effects of TKR and, at the same time, offered a unique opportunity to study the cost-effectiveness of TKR in two highly comparable treatment groups, thereby making an important contribution to previous non-randomized analyses of TKR cost-effectiveness<sup>7,14</sup>.

The purpose of the current study was to report the 24 months cost-effectiveness of TKR plus non-surgical treatment as compared to non-surgical treatment with the option of later TKR if needed

1  
2  
3  
4 91 using quality-adjusted life years (QALYs) data from the randomized trial and the unique Danish  
5  
6 92 health registries which contain detailed information on health sector costs, social costs, and  
7  
8  
9 93 prescription medication on the trial participants. We hypothesized that TKR plus non-surgical  
10  
11 94 treatment would be a more cost-effective procedure compared to non-surgical treatment with the  
12  
13 95 option of later TKR if needed at 24 months due to greater improvements in quality of life  
14  
15  
16 96 counterbalancing the expected additional cost related to the surgery.  
17  
18  
19 97  
20  
21  
22 98  
23  
24  
25 99  
26  
27  
28 100  
29  
30  
31 101  
32  
33  
34 102  
35  
36  
37  
38 103  
39  
40  
41 104  
42  
43  
44 105  
45  
46  
47 106  
48  
49  
50 107  
51  
52  
53 108  
54  
55  
56 109  
57  
58  
59  
60

For peer review only

## 1 2 3 4 5 110 **METHODS**

### 8 9 111 **Study design**

12 112 This was a pre-planned baseline to 24 months cost-utility analysis from a parallel group assessor-  
13  
14  
15 113 blinded randomized trial (1:1 ratio) that conforms to the CHEERS statement for reporting health  
16  
17 114 economic evaluations<sup>15</sup>. Costs were collected from a health system perspective, with QALYs used  
18  
19 115 as the outcome measure. Individual-level data were obtained from the clinical trial and linked with  
20  
21  
22 116 data from national registries for use in the analyses.

25 117 A brief presentation of the trial methods is provided below. Full details about the process for  
26  
27 118 recruitment, criteria for eligibility, the randomization procedure, allocation concealment and  
28  
29  
30 119 detailed description of the interventions have been published previously <sup>16</sup>.

### 33 120 **Ethics**

37 121 The study was designed to follow the principles of the Declaration of Helsinki and ethics approval  
38  
39  
40 122 was obtained from the local Ethics Committee of The North Denmark Region (N-20110024) and the  
41  
42 123 study was registered at ClinicalTrials.gov (NCT01410409).

### 45 124 **Participants**

49 125 One hundred patients diagnosed with symptomatic and moderate to severe radiographic knee OA  
50  
51 126 considered eligible for TKR by the orthopedic surgeon were included in the study. The study had  
52  
53  
54 127 three major exclusion criteria: 1) mean pain the previous week above 60 mm on a 100-mm visual  
55  
56 128 analogue scale, 2) previous knee replacement on the same side, and 3) need for bilateral  
57  
58 129 simultaneous TKR.

60

## Setting and time horizon

Patients were recruited between September 2011 and December 2013 from one of two specialized, public outpatient clinics at Aalborg University Hospital, Denmark (Frederikshavn and Farsoe), and all patients provided informed written consent before being enrolled. To have identical time periods for the whole population, we compared resource use and costs 1 year before randomization (pre-period) to resource use and costs 2 years after randomization for each individual patient.

## Randomization procedure and allocation concealment

The randomization schedule was generated a priori in permuted blocks of eight, stratified by site, and the allocation numbers were concealed in sealed, opaque envelopes prepared by an independent staff member. One research assistant at each of the two sites had access to the envelopes, opening them only after informed consent and baseline outcomes had been obtained.

## Comparators

Patients were randomly assigned (1:1) to 1) undergo TKR plus 12 weeks of supervised non-surgical treatment or 2) receive only the 12 weeks of supervised non-surgical treatment.

## Total knee replacement

A total cemented prosthesis with patellar resurfacing (NexGen, CR-Flex, fixed bearing or LPS-Flex, fixed bearing, Zimmer, Warsaw, Indiana, USA) was inserted by high-volume orthopedic specialists (a surgeon performing +100 TKRs/year) using the surgical methods recommended by the manufacturer<sup>17</sup>. Surgery was performed by the surgeon in charge of the assessment at the time of recruitment.

1  
2  
3  
4  
5  
6  
7  
8  
9  
10  
11  
12  
13  
14  
15  
16  
17  
18  
19  
20  
21  
22  
23  
24  
25  
26  
27  
28  
29  
30  
31  
32  
33  
34  
35  
36  
37  
38  
39  
40  
41  
42  
43  
44  
45  
46  
47  
48  
49  
50  
51  
52  
53  
54  
55  
56  
57  
58  
59  
60

## 150 **Supervised non-surgical treatment**

151 The 12-week individualized, non-surgical treatment program included exercise, patient education,  
152 and insoles, with dietary advice and/or pain medication prescribed if indicated. The treatments were  
153 delivered by physiotherapists and dieticians at Aalborg University Hospital, Denmark.

### 154 **Exercise**

155 The NEuroMuscular EXercise training program (NEMEX), previously found feasible in patients  
156 with moderate to severe knee OA awaiting joint replacement<sup>18</sup>, was administered in 60-min group-  
157 based sessions twice weekly supervised by a physiotherapist. To increase long-term adherence, after  
158 12 weeks of exercise, the patients undertook a transition period of 8 weeks where the exercise  
159 program was increasingly performed at home.

### 160 **Patient education**

161 Patient education was delivered as two 60-minute group-based educational sessions which actively  
162 engaged the patients in their treatment. The sessions focused on disease characteristics, advice  
163 about treatment and self-help. Sessions were held in groups of up to 16 patients and were facilitated  
164 by the project physiotherapist.

### 165 **Dietary advice**

166 Patients with a body mass index  $\geq 25$  at baseline had four individual 1-hour consultations with a  
167 dietician with the overall aim of reducing body weight by at least 5%<sup>19</sup>. The program was based on  
168 motivational interviewing<sup>20</sup>.

### 169 **Insoles**



1  
2  
3  
4 170 Patients received individually fitted full-length Formthotics Original Dual Medium (perforated)  
5  
6 171 insoles with medial arch support (Foot Science International, Christchurch, New Zealand). A 4°  
7  
8  
9 172 lateral wedge was added to the insoles if patients had a knee-lateral-to-foot position (the knee  
10  
11 173 moves over, or lateral, to the 5th toe in three or more of five trials)<sup>21</sup>.

#### 14 174 **Pain medication**

16  
17 175 Paracetamol 1 g four times daily, ibuprofen 400 mg three times daily, and pantoprazole 20 mg daily  
18  
19  
20 176 were prescribed by the orthopedic surgeon if indicated. Prescriptions were reassessed every 3 weeks  
21  
22 177 and the patients were instructed to contact the study team if they were uncertain about the need for  
23  
24 178 continued pain medication.

#### 27 179 **Booster sessions**

29  
30  
31 180 After the 12-week non-surgical program and the 8-week transition period and until the 12-month  
32  
33 181 follow up, a physiotherapist phoned the patients monthly to support exercise adherence. Patients  
34  
35 182 consulting the dietician were telephoned twice by the dietician to encourage dietary adherence.

#### 38 183 **Patient and public involvement**

40  
41 184 While no patients were involved in this cost-effectiveness analysis, the specific content of the non-  
42  
43 185 surgical treatment was guided by feedback from patients to ensure feasibility and acceptance.

#### 47 186 **Measurement of resource use and costs**

49  
50 187 Information on resource use and costs, including health care costs and public transfer income for  
51  
52 188 each patient, was retrieved from Danish national registries up until the 24-month follow-up. In  
53  
54 189 Denmark, the Danish Civil Registration System assigns every citizen a personal identification  
55  
56  
57 190 number (central personal registration number), which allows for the linking of information between  
58  
59 191 national registries at the individual level. This enables identification of the patients in the trial and  
60

1  
2  
3  
4 192 calculations of costs associated with these individuals. Health care costs comprised expenses  
5  
6  
7 193 associated with inpatient services, outpatient visits, primary care services and prescription  
8  
9 194 medication. Inpatient services were assessed as both including and excluding TKR surgeries during  
10  
11 195 the study period. Data on inpatient and outpatient services are available from the National Patient  
12  
13 196 Registry (NPR), which contains information on all kinds of patient contacts including diagnoses  
14  
15  
16 197 and diagnostic and treatment procedures. Linking data on resource use from NPR with the Danish  
17  
18 198 Case Mix System (Diagnosis-Related Groups) enabled estimation of associated costs. Primary care  
19  
20 199 included visits to the general practitioner, medical specialist, physiotherapist, chiropractor,  
21  
22  
23 200 laboratory work and others. Resources related to utilization of the primary care services were  
24  
25 201 derived from the Danish National Health Insurance Service Register. Costs were estimated for all  
26  
27 202 prescription medication; pain medication (ATC-codes N02A, N02B and M01A) and non-pain  
28  
29  
30 203 medication (i.e. anything else besides pain medication), respectively. Medication costs were  
31  
32 204 calculated by multiplying the retail price with the prescribed quantity, available from the Danish  
33  
34 205 Medicines Agency.

35  
36  
37 206 Non protocol-driven resources, e.g. costs of recruitment, were not included. As both groups  
38  
39  
40 207 received the same supervised non-surgical treatment (as described above), this cost was not  
41  
42 208 included for either group. The cost of the non-surgical treatment was estimated to be between 560 €  
43  
44 209 (actual cost of the non-surgical treatment in the trial) to 1646 € (estimated cost of the non-surgical  
45  
46  
47 210 treatment in private practice in Denmark) per person.

48  
49  
50 211 To increase the international applicability of the study, costs were adjusted to 2015-equivalent price  
51  
52 212 levels using the consumer price index and converted to Euros (1 € = 7.45 DKK). 1 Euro  
53  
54 213 corresponded to 1.13 US dollars at the 2017 average exchange rate.  
55  
56  
57  
58  
59  
60

1  
2  
3  
4 214 Public transfer income was calculated as the number of weeks a person was receiving sick leave  
5  
6 215 pay, disability pension, early retirement and unemployment benefits (including activated persons).  
7  
8  
9 216 About half of the participants were older than 64 years (56%), and retired (age pension). This  
10  
11 217 information was available from national registries from Statistics Denmark.  
12  
13

## 14 218 **Measurement of effectiveness**

15  
16  
17  
18 219 A generic measure of health in terms of QALYs gained was used as the effectiveness measure of  
19  
20 220 effects up until the 24-month follow-up. This is a composite measure that considers both the  
21  
22  
23 221 quantity and quality of life of an individual. The maximum achievable health utility is 1 and hence,  
24  
25 222 a QALY value of 1 reflects one year of full health, whereas a QALY value of 0 reflects death.  
26  
27 223 Health-related quality of life (HRQoL; health utility) was measured using the three-level version of  
28  
29  
30 224 the EuroQol Group 5-Dimension Self-Report Questionnaire (EQ-5D), including the score on the  
31  
32 225 descriptive index (ranging from -0.59 to 1.00) and the score on the visual analogue scale (ranging  
33  
34 226 from 0 to 100)<sup>22</sup>, at baseline, at 3 months, 6 months, 12 months, and at the 24 months follow-up.  
35  
36  
37 227 The baseline to 12 months EQ-5D data were previously published in the primary RCT report <sup>13</sup>, but  
38  
39 228 has not previously been used for cost-effectiveness analyses. The EQ-5D-3L has five digits  
40  
41 229 measuring mobility, self-care, usual activities, pain discomfort and anxiety/depression. The  
42  
43 230 descriptive index is based on a Danish “time trade-off” value set<sup>23</sup>, which is a method used to  
44  
45  
46 231 evaluate the relative amount of time patients would be willing to sacrifice to avoid a certain poor  
47  
48 232 health state. The patients completed the EQ-5D at baseline and all follow-up visits at the  
49  
50 233 Department of Occupational Therapy and Physiotherapy, Aalborg University Hospital, Denmark.  
51  
52  
53 234  
54  
55 235  
56  
57 236  
58  
59  
60

1  
2  
3  
4  
5  
6  
7  
8  
9  
10  
11  
12  
13  
14  
15  
16  
17  
18  
19  
20  
21  
22  
23  
24  
25  
26  
27  
28  
29  
30  
31  
32  
33  
34  
35  
36  
37  
38  
39  
40  
41  
42  
43  
44  
45  
46  
47  
48  
49  
50  
51  
52  
53  
54  
55  
56  
57  
58  
59  
60

## 237 **Analytical methods**

### 238 **Missing data**

239 Missing data were handled by using multiple imputation, which enables individuals with  
240 incomplete data to be included in the analysis. The underlying assumption when using multiple  
241 imputation is that data are missing at random, i.e. the probability of missing values is *not* dependent  
242 on unobserved data. Missing data were imputed using multiple imputation in SAS, and the  
243 assumption of data missing at random was also tested and confirmed in SAS. Missing utility values  
244 occurred at 3, 6, 12 and 24 months, and thus, utilities were imputed at these time points using  
245 utilities from available time points.

### 246 **Costs in the pre-period, Year 1, and Year 2**

247 The costs of the two groups were compared by using arithmetic means for each period. The  
248 statistical significance of the difference between groups was assessed using the bootstrapped t-test.

### 249 **Cost-effectiveness analyses**

250 Regression analyses were used to estimate incremental costs and QALYs and data were analyzed in  
251 accordance with intention-to-treat principle. Costs in the regression analyses only included health  
252 care costs. Because costs are normally right-skewed and QALYs left-skewed, a gamma distribution  
253 was assumed in the regression analyses. Both regression analyses were adjusted for covariates in  
254 the base-case analysis, i.e. the cost regression was adjusted for age, sex and baseline costs and the  
255 QALY regression was adjusted for age, sex and baseline QALY. Two additional scenarios were  
256 also considered: one not taking covariates into account, i.e. without adjustment (Scenario 1), and the  
257 other not considering either covariates or missing values/imputations (Scenario 2).

1  
2  
3  
4 258 QALY gains or losses were calculated as the area under the curve, i.e. taking changes in utility over  
5  
6 259 time into account.

8  
9  
10 260 Costs and effects were discounted by 3%.

### 11 12 13 261 **Sub-analysis**

14  
15  
16 262 A sub-analysis, including deaths during the study period, was conducted for each scenario (Base-  
17  
18 case scenario, Scenario 1 and Scenario 2).  
19 263

### 20 21 22 264 **Sensitivity analyses**

23  
24  
25 265 A probabilistic sensitivity analysis was carried out for each scenario in the primary analysis and the  
26  
27 sub-analysis, respectively. The probabilistic sensitivity analysis takes into account all parameter  
28 266 uncertainty at once. Incremental costs and QALYs were used to simulate 10,000 random draws  
29  
30 267 resulting in a scatterplot reflecting the probability of cost-effectiveness. In Denmark, no officially  
31  
32 268 set willingness-to-pay threshold exists. Instead, we used a threshold of 22,665 Euros/QALY or  
33  
34 269 lower corresponding to the decision rule defined by the National Institute for Health and Care  
35  
36 270 Excellence (NICE) (£ 20,000)<sup>24</sup>.

37  
38  
39 271  
40  
41  
42 272 A cost-effectiveness acceptability curve illustrating the cost-effectiveness at different thresholds and  
43  
44 273 a cost-effectiveness plane showing the uncertainty around the ICER were produced (both excl.  
45  
46 274 deaths).

47  
48  
49  
50 275 All analyses were performed using SAS 9.1.3 (SAS Institute, North Carolina, USA) and the  
51  
52 276 significance level was set to 0.05.

53  
54  
55 277

56  
57  
58 278

59  
60

1  
2  
3  
4  
5  
6  
7  
8  
9  
10  
11  
12  
13  
14  
15  
16  
17  
18  
19  
20  
21  
22  
23  
24  
25  
26  
27  
28  
29  
30  
31  
32  
33  
34  
35  
36  
37  
38  
39  
40  
41  
42  
43  
44  
45  
46  
47  
48  
49  
50  
51  
52  
53  
54  
55  
56  
57  
58  
59  
60

## 279 RESULTS

### 280 Patient characteristics

281 The baseline characteristics of the two groups of patients and patient flow are presented in Table 1  
282 and Fig 1, respectively. Below 8% (n=117) of patients assessed for eligibility were excluded due to  
283 pain intensity above 60mm out of 100mm.

284 \*\*\*\*\* PLACE TABLE 1 AND FIGURE 1 AROUND HERE \*\*\*\*\*

285  
286 Out of the 100 patients randomized, 24 months follow-up data were available for 47/50 (94%) in  
287 the non-surgical group and 43/50 (86%) in the TKR plus non-surgical group. Administrative data  
288 yielded that 16 out of 50 patients (32%) from the non-surgical group had a TKR before the 24  
289 months follow-up: 13 patients from baseline to 12 months and three patients between 12 and 24  
290 months. Mean duration (range) from initiating the non-surgical treatment to the TKR was 8.7 (2.6 to  
291 21.5) months. One of the 50 patients (2%) in the TKR plus non-surgical group decided not to  
292 undergo TKR anyway. One patient in the TKR plus non-surgical group had three revision surgeries  
293 ending up with the prosthesis being removed and the knee fused following a deep infection. Due to  
294 severe knee stiffness during the rehabilitation period after TKR, three patients in the TKR plus non-  
295 surgical group and one patient in the non-surgical group who had TKR later required manipulation  
296 of the knee under anesthesia. The mean follow-up time was 24.0 and 24.3 months in the TKR plus  
297 non-surgical group and the non-surgical group, respectively.

298  
299 Table 2 shows health care costs and public transfer income given as weeks in the pre-period, year 1

1  
2  
3  
4 300 (12 months) and year 2 (24 months), respectively. The groups had similar health care costs during  
5  
6  
7 301 the year prior to randomization (2,695 vs. 2,644 Euros). At 12 months after randomization, health  
8  
9 302 care costs in the TKR plus non-surgical group were more than double those of the non-surgical  
10  
11 303 group (16,343 vs. 7,028 Euros), mostly due to the surgical procedure. Although not statistically  
12  
13 304 significant, the costs in the TKR plus non-surgical group were lower at the 24 months follow-up  
14  
15  
16 305 (6,733 vs. 7,486 €) because some patients in the non-surgical group underwent TKR. No significant  
17  
18 306 between-group differences were found in weeks of incurring public transfer income.  
19  
20

21  
22 307 \*\*\*\*\* PLACE TABLE 2 AROUND HERE \*\*\*\*\*  
23

24 308  
25  
26  
27 309 The non-surgical group experienced a gain in health utilities of 0.056 from baseline to 24 months  
28  
29 310 while the TKR plus non-surgical group experienced a gain of 0.195, with the largest increases in  
30  
31 311 health utilities in both groups from baseline to 3 months (see Table 3 for utility values at the  
32  
33 312 different time points).  
34  
35

36  
37 313 \*\*\*\*\* PLACE TABLE 3 AROUND HERE \*\*\*\*\*  
38

39 314  
40  
41  
42 315 Incremental costs and QALYs for each scenario are presented in Table 4. In all scenarios, TKR plus  
43  
44 316 non-surgical treatment was more expensive, but also more effective in terms of QALY gain.  
45  
46  
47 317 Incremental cost-effectiveness ratios (ICERs) and the probability of cost-effectiveness at the  
48  
49 318 willingness-to-pay threshold for each scenario are also presented in Table 4. In the Base-case  
50  
51 319 (adjusted) scenario, TKR plus non-surgical treatment costed 32,611 Euros per QALY gained, which  
52  
53 320 is above the threshold for willingness-to-pay defined by NICE (22,665 Euros/QALY). However, in  
54  
55  
56 321 the unadjusted Scenario 1 and unadjusted and without imputation of missing values (scenario 2) the  
57  
58 322 ICERs were below the threshold (19,917 Euros/QALY and 18,497 Euros/QALY, respectively). The  
59  
60

1  
2  
3  
4  
5  
6  
7  
8  
9  
10  
11  
12  
13  
14  
15  
16  
17  
18  
19  
20  
21  
22  
23  
24  
25  
26  
27  
28  
29  
30  
31  
32  
33  
34  
35  
36  
37  
38  
39  
40  
41  
42  
43  
44  
45  
46  
47  
48  
49  
50  
51  
52  
53  
54  
55  
56  
57  
58  
59  
60

323 probability of cost-effectiveness of TKR plus non-surgical treatment was only 23.2% in the  
324 (adjusted) Base-case scenario but increased to 58.3% and 61.9% in Scenarios 1 and 2, respectively.

\*\*\*\*\* PLACE TABLE 4 AROUND HERE \*\*\*\*\*

327 Cost-effectiveness acceptability curve showing the probability of TKR plus non-surgical treatment  
328 being cost-effective at different thresholds is presented in Figure 2. The probability of cost-  
329 effectiveness was below 60% up until a threshold of approx. 40,000 Euros/QALY. To reach a  
330 probability of cost-effectiveness greater than 90%, a threshold of minimum 60,000 Euros/QALY  
331 was needed.

\*\*\*\*\* PLACE FIGURE 2 AROUND HERE \*\*\*\*\*

333 Cost-effectiveness plane illustrating the uncertainty around the ICER is presented in Supplementary  
334 appendix figure 1.

### 335 **Sub-analysis including deaths**

336 Three persons died in the TKR plus non-surgical treatment group and one person in the non-  
337 surgical treatment only group. Including deaths in the analysis decreased the QALY gained in both  
338 groups. The non-surgical group experienced a gain in health utilities of 0.040 from baseline to 24  
339 months while the TKR plus non-surgical group experienced a gain of 0.136, with the largest  
340 increases in health utilities in both groups from baseline to 3 months (see Supplementary appendix  
341 table 1 for utility values at the different time points).

342  
343 Including deaths in the regression analysis changed the estimates of incremental costs and QALYs  
344 (Supplementary appendix table 2). TKR plus non-surgical treatment was still more expensive and  
345 more effective for all scenarios but in all three scenarios the ICER exceeded the NICE threshold. In



1  
2  
3  
4 346 the Base-case scenario, the ICER was more than twice as high as the threshold for willingness-to-  
5  
6  
7 347 pay defined by NICE (22,665 Euros/QALY), and the probability of cost-effectiveness was only  
8  
9 348 7.8%. In Scenario 1 and 2 the probability of cost-effectiveness was 12.4% and 13.8%, respectively.  
10  
11  
12 349  
13  
14  
15  
16 350  
17  
18  
19 351  
20  
21  
22  
23 352  
24  
25  
26  
27 353  
28  
29  
30  
31 354  
32  
33  
34  
35 355  
36  
37  
38  
39 356  
40  
41  
42  
43 357  
44  
45  
46  
47 358  
48  
49  
50  
51 359  
52  
53  
54  
55 360  
56  
57

## 58 361 **DISCUSSION**

1  
2  
3  
4 362 TKR plus non-surgical treatment appear to be more expensive, but also more effective than non-  
5  
6  
7 363 surgical treatment after 24 months in patients with knee OA eligible for TKR and moderate  
8  
9 364 intensity pain. The cost-utility analysis suggested that TKR plus non-surgical treatment was not  
10  
11 365 cost-effective compared to non-surgical treatment with the option of later TKR if needed from a 24-  
12  
13 366 month health system perspective in secondary care in Denmark when adjusting for covariates and  
14  
15  
16 367 imputing missing values. Results were sensitive to changes, as the treatment was cost-effective in  
17  
18 368 the unadjusted scenario, highlighting the need for further research with 5 to 10-year time horizons.  
19  
20  
21 369 Given the extensive burden of knee OA<sup>3,4</sup>, there is considerable societal demand for evidence on  
22  
23 370 cost-effective evidence-based treatments<sup>25</sup>. The current study provides the first direct comparison of  
24  
25  
26 371 two different treatment strategies in terms of cost-effectiveness after 24 months for patients with  
27  
28 372 moderate to severe symptomatic and radiographic knee OA. The cost-utility analysis was conducted  
29  
30 373 alongside a randomized trial, which demonstrated that TKR plus non-surgical treatment compared  
31  
32 374 to non-surgical treatment was twice as effective in terms of pain relief and functional improvements  
33  
34  
35 375 after 12 and 24 months<sup>13,26</sup>. Therefore, we hypothesized that TKR would be a cost-effective  
36  
37 376 procedure after 24 months due to higher improvements in quality of life counterbalancing the  
38  
39  
40 377 expected additional cost related to the procedure. However, in contrast to our hypothesis, TKR plus  
41  
42 378 non-surgical treatment was not found to be cost-effective compared to non-surgical treatment with  
43  
44 379 the option of later TKR if needed from a 24 months perspective in secondary care in Denmark. The  
45  
46 380 cost per QALY gained exceeded the threshold defined by NICE by approximately 10,000 Euros<sup>24</sup>.  
47  
48  
49 381 However, without adjustment for covariates and imputation of missing values the cost per QALY  
50  
51 382 was just cost-effective according to the threshold (ICER of 18,497 Euros/QALY).  
52  
53  
54 383 Our results from the Base-case scenario contrast with findings in a recent systematic review<sup>27</sup>. The  
55  
56 384 review included four studies examining the cost-effectiveness of TKR compared to non-surgical  
57  
58  
59 385 procedures and all four concluded that TKR was a cost-effective option. However, as opposed to  
60

1  
2  
3  
4 386 our study, none of the previous studies were based on a randomized trial and the content of the non-  
5  
6  
7 387 surgical treatment was neither as comprehensive nor aligned with evidence-based recommendations  
8  
9 388 as the non-surgical treatment in our study. Two of the previous studies used a Markov model to  
10  
11 389 assess the long-term and lifetime cost-effectiveness of TKR<sup>28,29</sup>. The remaining two were cohort-  
12  
13 390 based studies examining short-term cost-effectiveness of TKR<sup>30,31</sup>. A recent cohort-based cost-  
14  
15  
16 391 effectiveness analysis, not included in the systematic review, concluded that TKR was not cost-  
17  
18 392 effective at a group level over 8 years, while it would be cost-effective if it was restricted to patients  
19  
20 393 with more severe symptoms<sup>14</sup>. In contrast, we did not find that TKR was cost-effective in addition  
21  
22  
23 394 to non-surgical treatment after 24 months in patients with moderate intensity pain. Our study  
24  
25 395 provides the first cost-effectiveness analysis of TKR in addition to recommended non-surgical  
26  
27 396 treatment using two comparable treatment groups, thereby providing an important addition to the  
28  
29  
30 397 above mentioned non-randomized studies.

31  
32  
33 398 One could argue that extending the time horizon might have led to a different conclusion. If the  
34  
35 399 positive effect of the surgery persists beyond the 24 months, TKR plus non-surgical treatment might  
36  
37 400 eventually end up being a cost-effective option. Though the mean utility fluctuates slightly over  
38  
39  
40 401 time in both groups, there seems to be an overall improvement in the TKR plus non-surgical group  
41  
42 402 as compared to non-surgical treatment only. Assuming that this between-group difference is at least  
43  
44 403 maintained and a potential increased cost in the non-surgical group due to future TKR surgery, this  
45  
46 404 could improve the cost-effectiveness ratios in favor of TKR plus non-surgical treatment. However,  
47  
48  
49 405 as indicated by a previous report<sup>32</sup>, improvements in symptoms might decline from 1 to 5 years  
50  
51 406 after TKR, questioning the assumptions underlining a potential long-term cost-effectiveness of  
52  
53 407 TKR. In the TKR plus non-surgical group, three people died during the period, while only one  
54  
55  
56 408 person died in the non-surgical group. When including the deaths in the analysis, TKR plus non-  
57  
58 409 surgical treatment was still more effective than non-surgical treatment, though not as effective as in  
59  
60

1  
2  
3  
4  
5  
6  
7  
8  
9  
10  
11  
12  
13  
14  
15  
16  
17  
18  
19  
20  
21  
22  
23  
24  
25  
26  
27  
28  
29  
30  
31  
32  
33  
34  
35  
36  
37  
38  
39  
40  
41  
42  
43  
44  
45  
46  
47  
48  
49  
50  
51  
52  
53  
54  
55  
56  
57  
58  
59  
60

410 the primary analysis. This is because death corresponds to a QALY value of zero, thereby  
411 attenuating the effect of the surgery.

## 412 **Strengths and limitations**

413 All treatments, in particular surgical treatment, are associated with placebo effects<sup>33</sup>. As our study  
414 did not include a sham surgery control group, we were not able to evaluate the proportion of the 24  
415 months treatment effects attributable to contextual factors<sup>34</sup>. Neither did we include a group  
416 receiving TKR without the non-surgical treatment, leaving us without the possibility of evaluating  
417 the additional effect and cost of the non-surgical treatment. As 32% from the non-surgical group  
418 had TKR surgery during the 24 months, it is likely that the true additional effect and cost of TKR  
419 have been underestimated in the study. Furthermore, as one of the exclusion criteria was mean pain  
420 the previous week above 60 mm on a 100-mm visual analogue scale, our results might not be  
421 generalizable to patients with more severe pain at baseline. However, 42% of the patients reported  
422 pain higher than 60 mm when asked about worst pain during the previous 24 hours and the mean  
423 pain intensity in our trial of 49 on a 0-100 worst to best scale is comparable to a range of previous  
424 clinical studies evaluating pain severity prior to TKR<sup>35-37</sup>. Additionally, the effects from non-  
425 surgical treatments, such as exercise, does not seem to be associated with pain severity at baseline<sup>38</sup>,  
426 suggesting that the non-surgical treatment might be as effective in patients with more severe pain.  
427 The short time horizon and the different findings in the analysis without adjustment for covariates  
428 and imputation of missing values and the sub-analysis including deaths emphasize the susceptibility  
429 of the results and highlight the need for further analyses in the field including follow-ups at 5-10  
430 years. The study strengths include the highly comparable treatment groups as a result of the  
431 randomization and the use of data from the unique Danish registries, which comprise data deemed

1  
2  
3  
4 432 to be of high quality. Linkage between these registries and the Danish Civil Registration system  
5  
6 433 allowed for retrieving data on an individual level, which is a unique feature of this study.  
7  
8  
9

10 434

## 11 12 13 435 **CONCLUSIONS**

14  
15  
16  
17 436 From a 24 months perspective in secondary care in Denmark, TKR plus non-surgical treatment does  
18  
19 437 not appear to be cost-effective compared to non-surgical treatment with the option of later TKR if  
20  
21 438 needed in patients with moderate to severe osteoarthritis and moderate intensity pain, eligible for  
22  
23  
24 439 TKR. However, as TKR plus non-surgical treatment was just cost-effective when not adjusting for  
25  
26 440 covariates and not imputing missing values, further confirmatory studies with longer follow-up are  
27  
28 441 needed.  
29  
30  
31

32 442

## 33 34 35 443 **Acknowledgements**

36  
37  
38 444 We thank the orthopedic surgeons and other health care personnel from the Department of  
39  
40 445 Orthopedic Surgery, Aalborg University Hospital, for their involvement in the recruitment of  
41  
42  
43 446 patients for the two studies; the Department of Occupational Therapy and Physiotherapy, Aalborg  
44  
45 447 University Hospital, Denmark, for allowing us to use their facilities for the treatment and outcome  
46  
47 448 assessments; project workers Anders Bundgaard Lind, Anders Norge Jensen, Anna Emilie Livbjerg,  
48  
49 449 Dorte Rasmussen, Helle Mohr Brøcher, Henriette Duve, Janus Duus Christiansen, Josephine  
50  
51  
52 450 Nielsen, Kate Mcgirr, Lasse Lengsø, Lonneke Hjerimitslev, Malene Daugaard, Maria Helena  
53  
54 451 Odefey, Mette Bøgedal, Mikkel Simonsen, Niels Balslev, Rikke Elholm Jensen, and Svend Lyhne  
55  
56 452 for helping with administrative tasks, data collection, data entry, and treatment; Medical secretary  
57  
58  
59 453 Anette Fristrup for extracting data from hospital records; and Economist Ole Dahl, Aalborg  
60

1  
2  
3  
4  
5  
6  
7  
8  
9  
10  
11  
12  
13  
14  
15  
16  
17  
18  
19  
20  
21  
22  
23  
24  
25  
26  
27  
28  
29  
30  
31  
32  
33  
34  
35  
36  
37  
38  
39  
40  
41  
42  
43  
44  
45  
46  
47  
48  
49  
50  
51  
52  
53  
54  
55  
56  
57  
58  
59  
60

454 University Hospital for extracting data on knee replacements from the National Patient Registry.

455 Finally, the study funders and patients participating should be acknowledged, because without their  
456 participation, it would not have been possible to conduct the trials.

457

## 458 **Author contributions**

459 **Study conception and design.** Skou, Kjellberg, Roos, Laursen, Arendt-Nielsen, Rasmussen,  
460 Simonsen

461 **Recruitment of patients:** Laursen, Simonsen.

462 **Acquisition of data.** Skou, Kjellberg

463 **Analysis and interpretation of data.** Skou, Kjellberg, Roos, Laursen, Arendt-Nielsen, Ibsen,  
464 Larsen, Rasmussen, Simonsen

465 **Drafting the article or revising it critically for important intellectual content.** Skou, Kjellberg,  
466 Roos, Laursen, Arendt-Nielsen, Ibsen, Larsen, Rasmussen, Simonsen

467 **Final approval of the article.** Skou, Kjellberg, Roos, Laursen, Arendt-Nielsen, Ibsen, Larsen,  
468 Rasmussen, Simonsen

469 All authors had full access to all the data (including statistical reports and tables) in the study and  
470 take responsibility for the integrity of the data and the accuracy of the data analysis.

471

## 472 **Funding/Support**

473 The work was supported by The Danish Rheumatism Association, The Health Science Foundation  
474 of North Denmark Region, Obel Family Foundation, Foot Science International, Spar Nord  
475 Foundation, The Bevica Foundation, The Association of Danish Physiotherapists Research Fund,  
476 Medical Specialist Heinrich Kopp's Grant, and The Danish Medical Association Research Fund.

1  
2  
3  
4 477 Dr. Skou is currently funded by a grant from Region Zealand and a grant the European Research  
5  
6 478 Council (ERC) under the European Union's Horizon 2020 research and innovation program (grant  
7  
8  
9 479 agreement No 801790).  
10  
11 480  
12  
13  
14 481  
15  
16

## 17 482 **Role of the Funder/Sponsor**

18  
19  
20 483 The funders played no role in the design and conduct of the study; collection, management,  
21  
22 484 analysis, and interpretation of the data; and preparation, review, or approval of the manuscript or  
23  
24 485 decision to submit the manuscript for publication.  
25  
26  
27 486  
28  
29

## 30 487 **Conflict of interest**

31  
32  
33 488 Dr. Roos is deputy editor of Osteoarthritis and Cartilage, the developer of the Knee injury and  
34  
35 489 Osteoarthritis Outcome Score (KOOS) and several other freely available patient-reported outcome  
36  
37 490 measures and co-founder of Good Life with Osteoarthritis in Denmark (GLA:D), a not-for profit  
38  
39  
40 491 initiative hosted by the University of Southern Denmark aimed at implementing clinical guidelines  
41  
42 492 for osteoarthritis in clinical practice.  
43

44 493 Dr. Skou is associate editor of Journal of Orthopaedic & Sports Physical Therapy, he has received  
45  
46 494 grants from The Lundbeck Foundation, personal fees from Munksgaard, all outside the submitted  
47  
48  
49 495 work. He is co-founder of GLA:D, a not-for profit initiative hosted by the University of Southern  
50  
51 496 Denmark aimed at implementing clinical guidelines for osteoarthritis in clinical practice.  
52

53 497 Ms. Ibsen is partner in the company i2minds, who specialize in collecting, processing and analyzing  
54  
55  
56 498 data and information.  
57

58 499 The authors report no other conflict of interest.  
59  
60

1  
2  
3  
4 500  
5  
6  
7 501  
8  
9  
10 502  
11  
12 503  
13  
14 504  
15  
16  
17 505  
18  
19 506  
20  
21 507  
22  
23 508  
24  
25  
26 509  
27  
28 510  
29  
30 511  
31  
32 512  
33  
34  
35 513  
36  
37 514  
38  
39  
40 515  
41  
42 516  
43  
44 517  
45  
46 518  
47  
48  
49 519  
50  
51 520  
52  
53  
54 521  
55  
56 522  
57 523  
58 524  
59  
60

## Data sharing

The data that support the findings of this study are available from Statistics Denmark but restrictions apply to the availability of these data, which were used under license for the current study, and so are not publicly available. Data are however available from the authors OS and ML upon reasonable request and with permission of Statistics Denmark.

## REFERENCES

1. Cross M, Smith E, Hoy D, Nolte S, Ackerman I, Fransen M, et al. The global burden of hip and knee osteoarthritis: estimates from the global burden of disease 2010 study. *Annals of the Rheumatic Diseases* 2014;73:1323-30. doi: 10.1136/annrheumdis-2013-204763 [doi]



- 1  
2  
3  
4 525 2. Peat G, McCarney R, Croft P. Knee pain and osteoarthritis in older adults: a review of  
5 526 community burden and current use of primary health care. *Annals of the Rheumatic Diseases* 2001;60:91-7.
- 6 527 3. Vos T, Flaxman AD, Naghavi M, Lozano R, Michaud C, Ezzati M, et al. Years lived with  
7 528 disability (YLDs) for 1160 sequelae of 289 diseases and injuries 1990-2010: a systematic analysis for the  
8 529 Global Burden of Disease Study 2010. *Lancet* 2012;380:2163-96. doi: 10.1016/S0140-6736(12)61729-2 [doi]
- 9 530 4. Salmon JH, Rat AC, Sellam J, Michel M, Eschard JP, Guillemin F, et al. Economic impact of  
10 531 lower-limb osteoarthritis worldwide: a systematic review of cost-of-illness studies. *Osteoarthritis Cartilage*  
11 532 2016;24:1500-8. doi: 10.1016/j.joca.2016.03.012
- 12 533 5. Nguyen US, Zhang Y, Zhu Y, Niu J, Zhang B, Felson DT. Increasing prevalence of knee pain and  
13 534 symptomatic knee osteoarthritis: survey and cohort data. *Annals of Internal Medicine* 2011;155:725-32.  
14 535 doi: 10.1059/0003-4819-155-11-201112060-00004
- 15 536 6. Carr AJ, Robertsson O, Graves S, Price AJ, Arden NK, Judge A, et al. Knee replacement. *Lancet*  
16 537 2012;379:1331-40. doi: 10.1016/S0140-6736(11)60752-6
- 17 538 7. Nwachukwu BU, Bozic KJ, Schairer WW, Bernstein JL, Jevsevar DS, Marx RG, et al. Current  
18 539 status of cost utility analyses in total joint arthroplasty: a systematic review. *Clin Orthop Relat Res*  
19 540 2015;473:1815-27. doi: 10.1007/s11999-014-3964-4
- 20 541 8. Beswick AD, Wylde V, Goberman-Hill R, Blom A, Dieppe P. What proportion of patients  
21 542 report long-term pain after total hip or knee replacement for osteoarthritis? A systematic review of  
22 543 prospective studies in unselected patients. *BMJ open* 2012;2:e000435. doi: 10.1136/bmjopen-2011-000435
- 23 544 9. Little AD, Judge A, Pandit H, Murray DW. Adverse outcomes after total and  
24 545 unicompartamental knee replacement in 101,330 matched patients: a study of data from the National Joint  
25 546 Registry for England and Wales. *Lancet* 2014;384:1437-45. doi: S0140-6736(14)60419-0 [pii]
- 26 547 10. Nelson AE, Allen KD, Golightly YM, Goode AP, Jordan JM. A systematic review of  
27 548 recommendations and guidelines for the management of osteoarthritis: The chronic osteoarthritis  
28 549 management initiative of the U.S. bone and joint initiative. *Seminars in arthritis and rheumatism*  
29 550 2014;43:701-12. doi: 10.1016/j.semarthrit.2013.11.012 [doi]
- 30 551 11. Singh JA, Vessely MB, Harmsen WS, Schleck CD, Melton LJ, 3rd, Kurland RL, et al. A  
31 552 population-based study of trends in the use of total hip and total knee arthroplasty, 1969-2008. *Mayo Clinic*  
32 553 *proceedings* 2010;85:898-904. doi: 10.4065/mcp.2010.0115; 10.4065/mcp.2010.0115
- 33 554 12. National statistics on 152 Arthroplasty knee, HCUPnet, Healthcare Cost and Utilization  
34 555 Project. 2013. (Accessed Web Page, 2018, at <http://hcupnet.ahrq.gov/>.)
- 35 556 13. Skou ST, Roos EM, Laursen MB, Rathleff MS, Arendt-Nielsen L, Simonsen O, et al. A  
36 557 Randomized, Controlled Trial of Total Knee Replacement. *The New England Journal of Medicine*  
37 558 2015;373:1597-606.
- 38 559 14. Ferket BS, Feldman Z, Zhou J, Oei EH, Bierma-Zeinstra SM, Mazumdar M. Impact of total  
39 560 knee replacement practice: cost effectiveness analysis of data from the Osteoarthritis Initiative. *Bmj*  
40 561 2017;356:j1131. doi: 10.1136/bmj.j1131
- 41 562 15. Husereau D, Drummond M, Petrou S, Carswell C, Moher D, Greenberg D, et al. Consolidated  
42 563 Health Economic Evaluation Reporting Standards (CHEERS) statement. *Bmj* 2013;346:f1049. doi:  
43 564 10.1136/bmj.f1049
- 44 565 16. Skou ST, Roos EM, Laursen MB, Rathleff MS, Arendt-Nielsen L, Simonsen OH, et al. Total knee  
45 566 replacement plus physical and medical therapy or treatment with physical and medical therapy alone: A  
46 567 randomised controlled trial in patients with knee osteoarthritis (the MEDIC-study). *BMC musculoskeletal*  
47 568 *disorders* 2012;13:67. doi: 10.1186/1471-2474-13-67
- 48 569 17. Endres S. High-flexion versus conventional total knee arthroplasty: a 5-year study. *Journal of*  
49 570 *orthopaedic surgery (Hong Kong)* 2011;19:226-9.
- 50 571 18. Ageberg E, Link A, Roos EM. Feasibility of neuromuscular training in patients with severe hip  
51 572 or knee OA: the individualized goal-based NEMEX-TJR training program. *BMC musculoskeletal disorders*  
52 573 2010;11:126. doi: 10.1186/1471-2474-11-126
- 53  
54  
55  
56  
57  
58  
59  
60

1  
2  
3  
4  
5  
6  
7  
8  
9  
10  
11  
12  
13  
14  
15  
16  
17  
18  
19  
20  
21  
22  
23  
24  
25  
26  
27  
28  
29  
30  
31  
32  
33  
34  
35  
36  
37  
38  
39  
40  
41  
42  
43  
44  
45  
46  
47  
48  
49  
50  
51  
52  
53  
54  
55  
56  
57  
58  
59  
60

19. Christensen R, Bartels EM, Astrup A, Bliddal H. Effect of weight reduction in obese patients diagnosed with knee osteoarthritis: a systematic review and meta-analysis. *Annals of the Rheumatic Diseases* 2007;66:433-9. doi: 10.1136/ard.2006.065904
20. Miller WR, Rollnick S. *Motivational interviewing: preparing people for change*. New York: Guilford Press; 2002.
21. Ageberg E, Bennell KL, Hunt MA, Simic M, Roos EM, Creaby MW. Validity and inter-rater reliability of medio-lateral knee motion observed during a single-limb mini squat. *BMC musculoskeletal disorders* 2010;11:265. doi: 10.1186/1471-2474-11-265
22. Szende A, Williams A. *Measuring Self-Reported population Health: An International Perspective based on EQ-5D*. Budapest: SpringMed Publishing; 2004.
23. Wittrup-Jensen KU, Lauridsen J, Gudex C, Pedersen KM. Generation of a Danish TTO value set for EQ-5D health states. *Scandinavian Journal of Public Health* 2009;37:459-66. doi: 10.1177/1403494809105287 [doi]
24. National Institute for Health Care Excellence. *Guide to the Methods of Technology Appraisal* 2013. London: National Institute for Health and Care Excellence (NICE); 2013.
25. Losina E, Paltiel AD, Weinstein AM, Yelin E, Hunter DJ, Chen SP, et al. Lifetime medical costs of knee osteoarthritis management in the United States: impact of extending indications for total knee arthroplasty. *Arthritis care & research* 2015;67:203-15. doi: 10.1002/acr.22412 [doi]
26. Skou ST, Roos EM, Laursen MB, Rathleff MS, Arendt-Nielsen L, Rasmussen S, et al. Total knee replacement and non-surgical treatment of knee osteoarthritis: 2-year outcome from two parallel randomized controlled trials. *Osteoarthritis and Cartilage* 2018;26:1170-80. doi: 10.1016/j.joca.2018.04.014
27. Kamaruzaman H, Kinghorn P, Oppong R. Cost-effectiveness of surgical interventions for the management of osteoarthritis: a systematic review of the literature. *BMC Musculoskeletal Disord* 2017;18:183. doi: 10.1186/s12891-017-1540-2
28. Ruiz D, Jr., Koenig L, Dall TM, Gallo P, Narzikul A, Parvizi J, et al. The direct and indirect costs to society of treatment for end-stage knee osteoarthritis. *The Journal of bone and joint surgery American volume* 2013;95:1473-80. doi: 10.2106/jbjs.l.01488
29. Bedair H, Cha TD, Hansen VJ. Economic benefit to society at large of total knee arthroplasty in younger patients: a Markov analysis. *The Journal of bone and joint surgery American volume* 2014;96:119-26. doi: 10.2106/jbjs.l.01736
30. Waimann CA, Fernandez-Mazarambroz RJ, Cantor SB, Lopez-Olivo MA, Zhang H, Landon GC, et al. Cost-effectiveness of total knee replacement: a prospective cohort study. *Arthritis Care Res (Hoboken)* 2014;66:592-9. doi: 10.1002/acr.22186
31. Rasanen P, Paavolainen P, Sintonen H, Koivisto AM, Blom M, Ryyanen OP, et al. Effectiveness of hip or knee replacement surgery in terms of quality-adjusted life years and costs. *Acta Orthop* 2007;78:108-15. doi: 10.1080/17453670610013501
32. Nilsson AK, Toksvig-Larsen S, Roos EM. A 5 year prospective study of patient-relevant outcomes after total knee replacement. *Osteoarthritis and cartilage* 2009;17:601-6. doi: 10.1016/j.joca.2008.11.007; 10.1016/j.joca.2008.11.007
33. Wartolowska K, Judge A, Hopewell S, Collins GS, Dean BJ, Rombach I, et al. Use of placebo controls in the evaluation of surgery: systematic review. *BMJ (Clinical research ed)* 2014;348:g3253. doi: 10.1136/bmj.g3253 [doi]
34. Zou K, Wong J, Abdullah N, Chen X, Smith T, Doherty M, et al. Examination of overall treatment effect and the proportion attributable to contextual effect in osteoarthritis: meta-analysis of randomised controlled trials. *Ann Rheum Dis* 2016;75:7. doi: 10.1136/annrheumdis-2015-208387
35. Gossec L, Paternotte S, Maillefert JF, Combescure C, Conaghan PG, Davis AM, et al. The role of pain and functional impairment in the decision to recommend total joint replacement in hip and knee osteoarthritis: an international cross-sectional study of 1909 patients. Report of the OARSI-OMERACT Task Force on total joint replacement. *Osteoarthritis and cartilage* 2011;19:147-54. doi: 10.1016/j.joca.2010.10.025

- 1  
2  
3  
4 624 36. Keurentjes JC, Fiocco M, So-Osman C, Onstenk R, Koopman-Van Gemert AW, Poll RG, et al.  
5 625 Patients with severe radiographic osteoarthritis have a better prognosis in physical functioning after hip  
6 626 and knee replacement: a cohort-study. PLoS One 2013;8:e59500. doi: 10.1371/journal.pone.0059500  
7 627 37. Wise BL, Niu J, Felson DT, Hietpas J, Sadosky A, Torner J, et al. Functional Impairment Is a  
8 628 Risk Factor for Knee Replacement in the Multicenter Osteoarthritis Study. Clinical orthopaedics and related  
9 629 research 2015;473:2505-13. doi: 10.1007/s11999-015-4211-3 [doi]  
10 629 38. Juhl C, Christensen R, Roos EM, Zhang W, Lund H. Impact of exercise type and dose on pain  
11 630 and disability in knee osteoarthritis: A systematic review and meta-regression analysis of randomized  
12 631 controlled trials. Arthritis Rheumatol 2014;66:622-36. doi: 10.1002/art.38290;  
13 632  
14  
15 633  
16  
17  
18 634  
19  
20 635  
21 636  
22 637  
23 638  
24  
25 639  
26  
27 640  
28 641  
29  
30 642  
31  
32 643  
33 644  
34  
35 645  
36  
37 646  
38  
39 647  
40 648  
41  
42 649  
43  
44 650  
45 651  
46  
47 652  
48  
49 653  
50  
51 654  
52  
53  
54  
55 655

## Figure legends

1  
2  
3  
4  
5  
6  
7  
8  
9  
10  
11  
12  
13  
14  
15  
16  
17  
18  
19  
20  
21  
22  
23  
24  
25  
26  
27  
28  
29  
30  
31  
32  
33  
34  
35  
36  
37  
38  
39  
40  
41  
42  
43  
44  
45  
46  
47  
48  
49  
50  
51  
52  
53  
54  
55  
56  
57  
58  
59  
60

656 **Fig 1. Flow of patients in the randomized controlled trial of patients eligible for total knee**  
657 **replacement.** TKR=Total knee replacement; K-L score= Kellgren-Lawrence score; VAS=Visual  
658 Analogue Scale.

659 **Fig 2. Cost-effectiveness acceptability curve illustrating the probability of TKR plus non-**  
660 **surgical treatment being cost-effective at different thresholds (excl. deaths).**

661  
662  
663  
664  
665  
666  
667  
668  
669  
670

For peer review only

## Tables

**Table 1. Baseline characteristics in the randomized controlled trial of patients eligible for total knee replacement (TKR)**

| Baseline characteristics                                 | TKR+non-surgical group<br>(n=50) | Non-surgical group<br>(n=50) |
|----------------------------------------------------------|----------------------------------|------------------------------|
| Women, n (%)                                             | 32 (64)                          | 30 (60)                      |
| Age (years), mean (SD)                                   | 65.8 (8.7)                       | 67.0 (8.7)                   |
| Body Mass Index, mean (SD)                               | 32.3 (6.2)                       | 32.0 (5.8)                   |
| Bilateral knee pain, n (%)                               | 18 (36)                          | 17 (34)                      |
| Radiographic knee OA severity (Kellgren-Lawrence), n (%) |                                  |                              |
| Grade 1                                                  | 0 (0)                            | 0 (0)                        |
| Grade 2                                                  | 7 (14)                           | 5 (10)                       |
| Grade 3                                                  | 21 (42)                          | 21 (42)                      |
| Grade 4                                                  | 22 (44)                          | 24 (48)                      |
| KOOS scores                                              |                                  |                              |
| Pain                                                     | 48.6 (17.5)                      | 49.5 (13.1)                  |
| Symptoms                                                 | 54.0 (15.0)                      | 58.3 (15.2)                  |
| ADL                                                      | 55.0 (17.0)                      | 53.5 (14.2)                  |
| Sport/Rec                                                | 18.0 (14.7)                      | 16.7 (15.1)                  |
| QOL                                                      | 32.3 (15.3)                      | 32.7 (13.3)                  |
| KOOS <sub>4</sub>                                        | 47.4 (13.4)                      | 48.5 (11.4)                  |
| Timed Up and Go test, seconds                            | 9.4 (2.4)                        | 8.6 (2.1)                    |
| 20-meter walk test, seconds                              | 13.4 (3.7)                       | 12.2 (2.6)                   |
| Used pain medication in the last week, yes n (%)         | 33 (67)                          | 29 (58)                      |

Radiographic severity: Radiographic knee osteoarthritis severity on the Kellgren-Lawrence scale; KOOS<sub>4</sub>: The mean score of four out of five of the Knee injury and Osteoarthritis Outcome Score subscales covering Pain, Symptoms, Function in daily living (ADL), Sport/Rec: Function in sport and recreation. and Quality of life (QOL), with scores ranging from 0 to 100 (worst to best scale).

1  
2  
3  
4  
5  
6  
7  
8  
9  
10  
11  
12  
13  
14  
15  
16  
17  
18  
19  
20  
21  
22  
23  
24  
25  
26  
27  
28  
29  
30  
31  
32  
33  
34  
35  
36  
37  
38  
39  
40  
41  
42  
43  
44  
45  
46  
47  
48  
49  
50  
51  
52  
53  
54  
55  
56  
57  
58  
59  
60688  
689**Table 2. Average health costs and public transfer income (measured as weeks) for the TKR plus non-surgical treatment group and the non-surgical treatment group prior to the study, at 1 and 2 follow up.**

| Health costs                  | Pre-period              |                     |         | Year 1 (0-12 months)    |                     |         | Year 2 (12-24 months)   |                     |         |
|-------------------------------|-------------------------|---------------------|---------|-------------------------|---------------------|---------|-------------------------|---------------------|---------|
|                               | TKR+non-surgical (N=50) | Non-surgical (N=50) | p value | TKR+non-surgical (N=50) | Non-surgical (N=50) | p-value | TKR+non-surgical (N=50) | Non-surgical (N=50) | p value |
|                               | €                       | €                   |         | €                       | €                   |         | €                       | €                   |         |
| Hospital sector               |                         |                     |         |                         |                     |         |                         |                     |         |
| Inpatient (incl. TKRs)        | 515                     | 546                 | 1.000   | 13,149                  | 4,016               | <0.001* | 3,845                   | 3,881               | 1.000   |
| Inpatient (excl. TKRs)        | 515                     | 546                 | 1.000   | 3,412                   | 1,515               | 0.980   | 3,436                   | 2,278               | 1.000   |
| Outpatient                    | 1,132                   | 1,234               | 1.000   | 2,035                   | 2,188               | 1.000   | 1,887                   | 2,772               | 1.000   |
| Primary sector, all           |                         |                     |         |                         |                     |         |                         |                     |         |
| General practitioner          | 448                     | 421                 | 1.000   | 454                     | 351                 | 0.550   | 382                     | 361                 | 1.000   |
| Medical specialist            | 270                     | 238                 | 1.000   | 325                     | 193                 | 0.010*  | 246                     | 201                 | 0.900   |
| Physiotherapy                 | 126                     | 122                 | 1.000   | 84                      | 91                  | 1.000   | 91                      | 90                  | 1.000   |
| Chiropractic                  | 37                      | 42                  | 1.000   | 24                      | 45                  | 0.980   | 25                      | 44                  | 1.000   |
| Lab work and other            | 3                       | 5                   | 1.000   | 5                       | 5                   | 1.000   | 6                       | 3                   | 1.000   |
| Other                         | 12                      | 14                  | 1.000   | 17                      | 18                  | 1.000   | 15                      | 24                  | 1.000   |
| Prescription medication, all  |                         |                     |         |                         |                     |         |                         |                     |         |
| Other medication              | 599                     | 443                 | 1.000   | 704                     | 472                 | 0.950   | 620                     | 471                 | 1.000   |
| Pain medication               | 534                     | 377                 | 1.000   | 607                     | 382                 | 0.920   | 572                     | 403                 | 1.000   |
| NSAID (N02B + M01A)           | 65                      | 66                  | 1.000   | 97                      | 91                  | 1.000   | 48                      | 69                  | 1.000   |
| Opioids (N02A)                | 51                      | 50                  | 1.000   | 53                      | 66                  | 1.000   | 33                      | 52                  | 0.980   |
| Opioids (N02A)                | 13                      | 13                  | 1.000   | 45                      | 21                  | 0.250   | 14                      | 14                  | 1.000   |
| All health costs (incl. TKRs) | 2,695                   | 2,644               | 1.000   | 16,343                  | 7,028               | <0.001* | 6,733                   | 7,486               | 1.000   |
| All health costs (excl. TKRs) | 2,695                   | 2,644               | 1.000   | 6,606                   | 4,527               | 1.000   | 6,325                   | 5,882               | 1.000   |
| Public transfer income        |                         |                     |         |                         |                     |         |                         |                     |         |
|                               | Pre-period              |                     |         | Year 1 (0-12 months)    |                     |         | Year 2 (12-24 months)   |                     |         |
|                               | TKR+non-surgical        | Non-surgical        | p value | TKR+non-surgical        | Non-surgical        | p value | TKR+non-surgical        | Non-surgical        | p value |
|                               | Weeks                   | Weeks               |         | Weeks                   | Weeks               |         | Weeks                   | Weeks               |         |
| Observations (N)              | 19                      | 15                  |         | 19                      | 15                  |         | 19                      | 15                  |         |
| Total public transfer income  | 12.9                    | 9.2                 | 1.000   | 13.2                    | 9.1                 | 0.980   | 11.6                    | 6.8                 | 0.910   |
| Unemployment                  | 5.2                     | 1.0                 | 0.470   | 3.5                     | 0.5                 | 0.570   | 5.7                     | 0.2                 | 0.080   |
| Sick pay                      | 3.1                     | 0.0                 | 0.140   | 5.3                     | 0.7                 | 0.200   | 1.7                     | 0.8                 | 1.000   |
| Disability pension            | 0.9                     | 1.0                 | 1.000   | 1.0                     | 1.0                 | 1.000   | 1.0                     | 1.2                 | 1.000   |
| Early retirement              | 3.8                     | 7.1                 | 0.930   | 3.4                     | 6.9                 | 0.950   | 3.2                     | 4.7                 | 1.000   |

TKR=Total knee replacement. Significant differences ( $p<0.05$ ) are indicated with an asterisk.

691 **Table 3. Primary analysis excluding deaths. Health utilities for the TKR plus non-surgical treatment group and the non-surgical treatment**  
 692 **group at baseline and at 3 months, 6 months, 12 months and 24 months follow-up.**

| Utilities | TKR+non-surgical group |          |          |           |           |                        | Non-surgical group |          |          |           |           |                        |
|-----------|------------------------|----------|----------|-----------|-----------|------------------------|--------------------|----------|----------|-----------|-----------|------------------------|
|           | Baseline               | 3 months | 6 months | 12 months | 24 months | 24 months (discounted) | Baseline           | 3 months | 6 months | 12 months | 24 months | 24 months (discounted) |
| Mean      | 0.658                  | 0.848    | 0.866    | 0.858     | 0.878     | 0.853                  | 0.680              | 0.780    | 0.755    | 0.795     | 0.758     | 0.736                  |
| SD        | 0.160                  | 0.145    | 0.141    | 0.180     | 0.155     | 0.151                  | 0.148              | 0.118    | 0.158    | 0.153     | 0.199     | 0.193                  |
| Median    | 0.723                  | 0.824    | 0.824    | 0.919     | 1.000     | 0.971                  | 0.723              | 0.776    | 0.776    | 0.776     | 0.776     | 0.753                  |
| 25th      | 0.655                  | 0.776    | 0.776    | 0.774     | 0.723     | 0.702                  | 0.655              | 0.723    | 0.718    | 0.723     | 0.723     | 0.702                  |
| 75th      | 0.723                  | 1.000    | 1.000    | 1.000     | 1.000     | 0.971                  | 0.771              | 0.824    | 0.824    | 1.000     | 0.838     | 0.814                  |
| N         | 47                     | 39       | 41       | 41        | 43        | 43                     | 49                 | 45       | 48       | 48        | 47        | 47                     |

TKR=Total knee replacement; QALY= quality-adjusted life-years; discounted= i.e. future health utilities value converted to present health utilities value.

695 **Table 4. Primary analysis excluding deaths. Incremental cost-effectiveness ratios (ICERs) and probability of cost-effectiveness of TKR plus**  
 696 **non-surgical treatment vs non-surgical treatment alone for each scenario.**

| Analysis   | Incremental cost | 95% CI          | Incremental effect | 95% CI         | ICER     | Probability of cost-effectiveness at € 22,665 |
|------------|------------------|-----------------|--------------------|----------------|----------|-----------------------------------------------|
|            | €                |                 | QALY               |                | € / QALY | %                                             |
| Base-case  | 6,070            | 1,857 to 10,283 | 0.186              | 0.078 to 0.294 | 32,611   | 23.2                                          |
| Scenario 1 | 4,640            | -200 to 9,480   | 0.233              | 0.088 to 0.378 | 19,917   | 58.3                                          |
| Scenario 2 | 4,481            | -668 to 9,629   | 0.242              | 0.095 to 0.390 | 18,497   | 61.9                                          |

TKR=Total knee replacement; QALY=quality-adjusted life-years; 95% CI=95% confidence interval  
 Base-case=Adjusted for age, sex and baseline value  
 Scenario 1=unadjusted; Scenario 2=unadjusted and without imputation of missing values

## Supporting information captions

S1. Supplementary appendix including supp. table 1 and 2 and supp. figure 1.

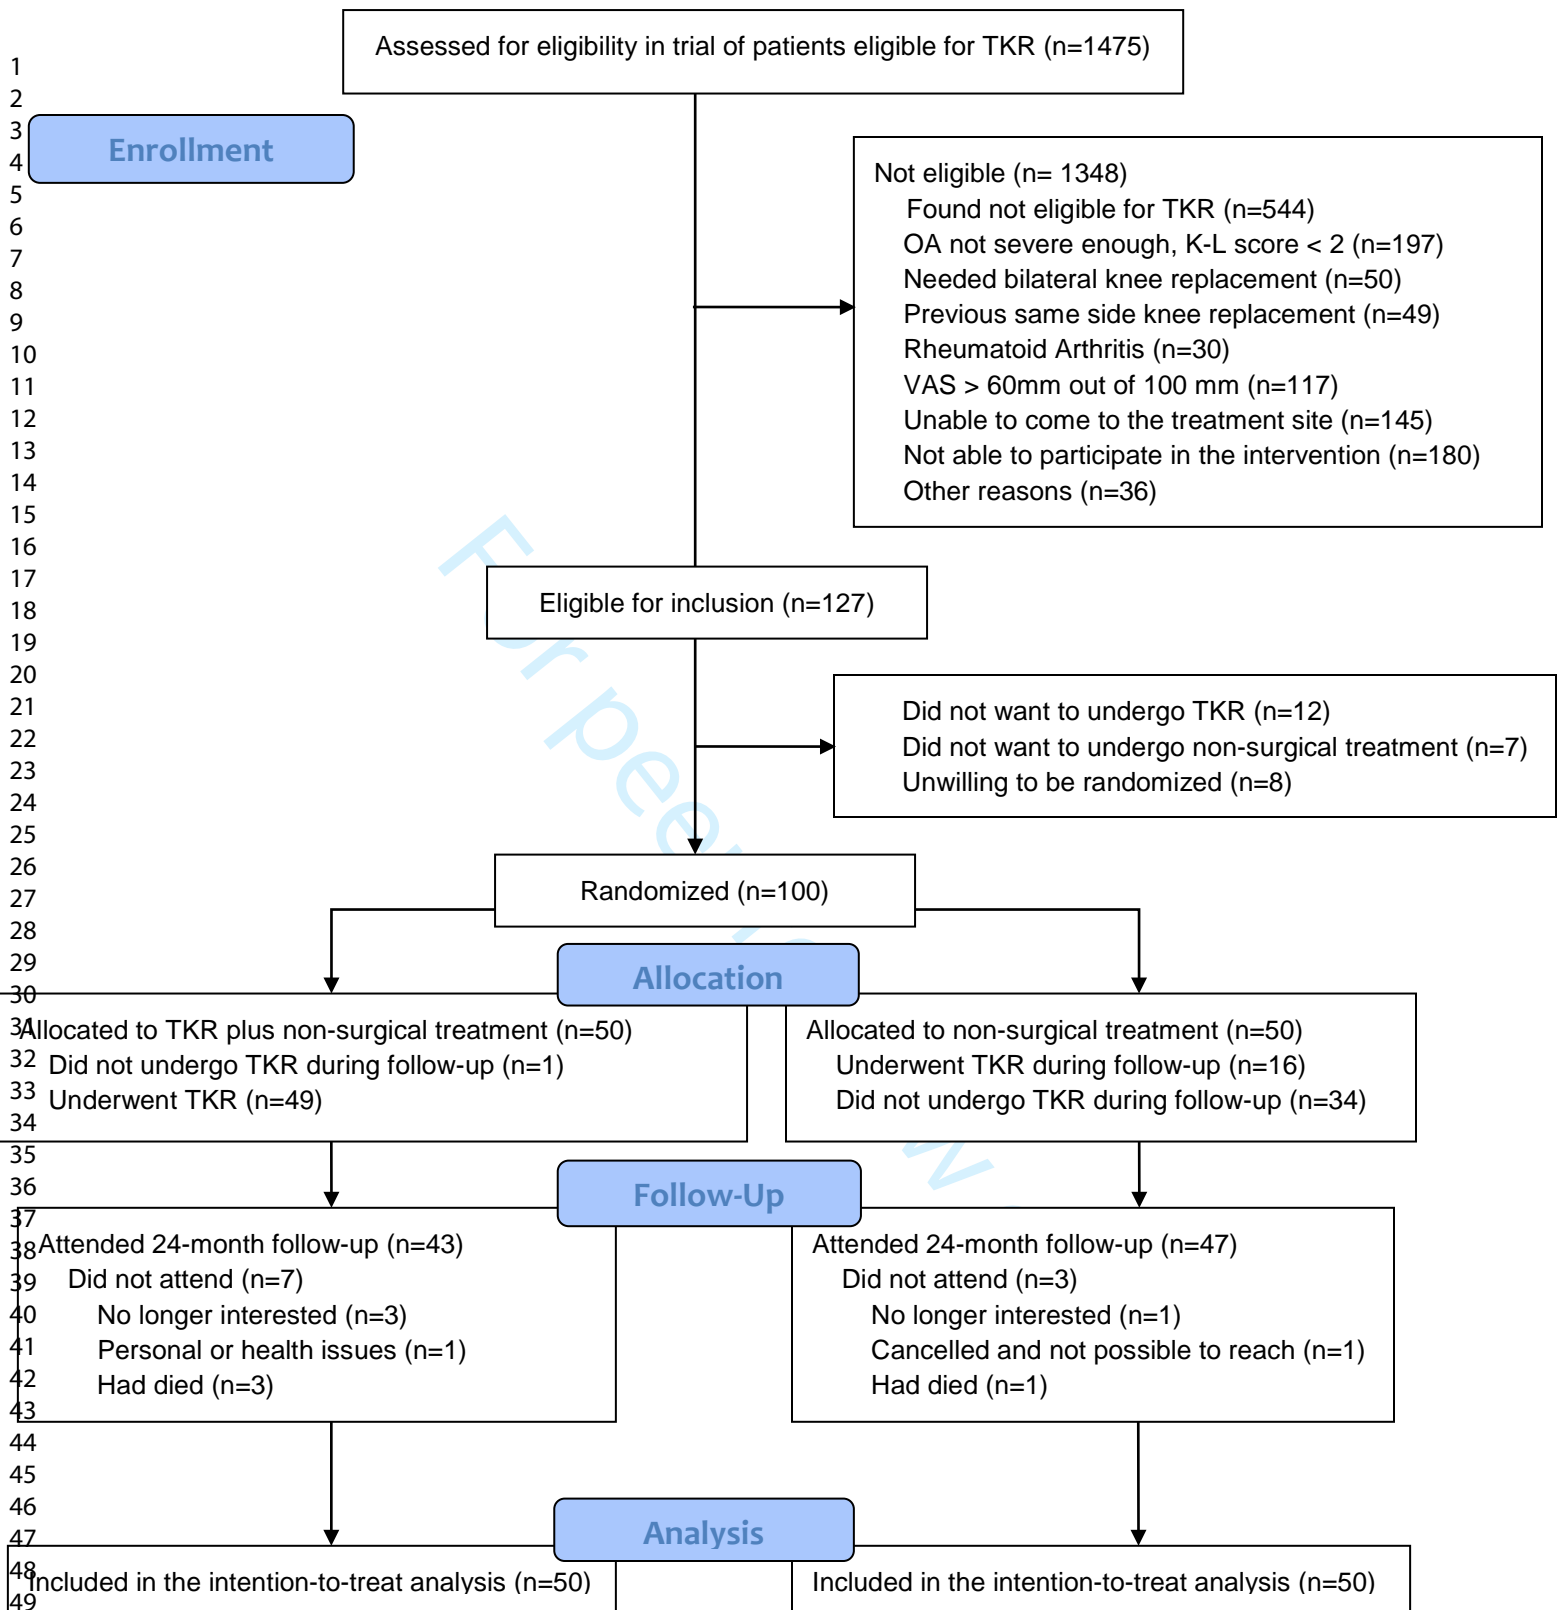



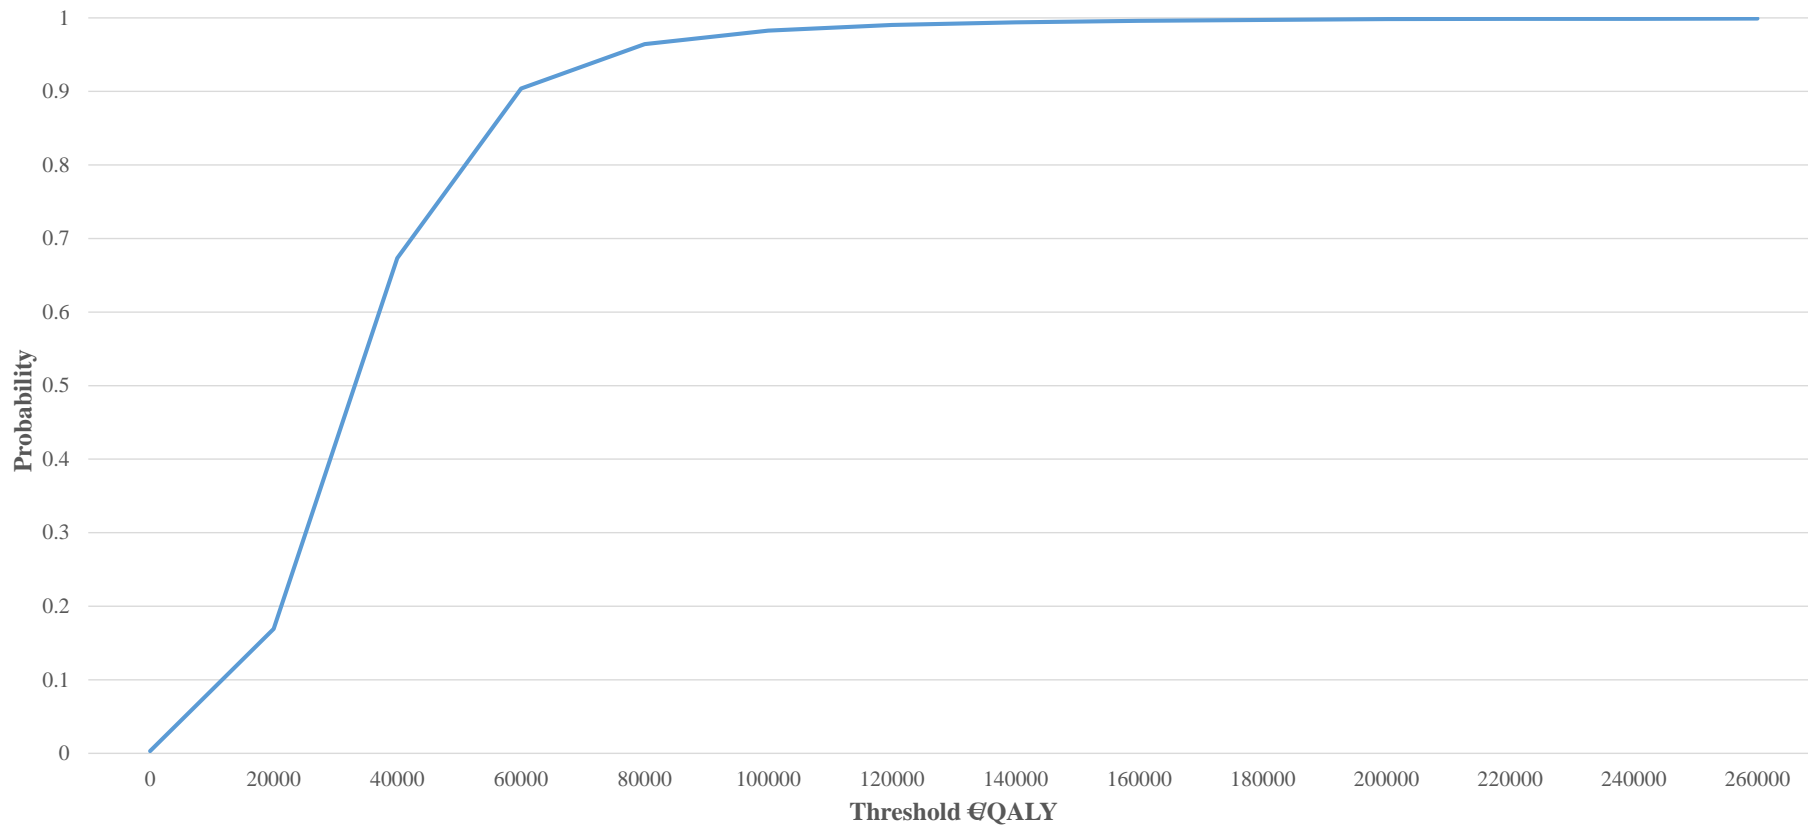

1  
2  
3  
4  
5  
6  
7  
8  
9  
10  
11  
12  
13  
14  
15  
16  
17  
18  
19  
20  
21  
22  
23  
24  
25  
26  
27  
28  
29  
30  
31  
32  
33  
34  
35  
36  
37  
38  
39  
40  
41  
42  
43  
44  
45  
46

## S1. Supplementary appendix

**Supp. table 1. Sub-analysis including deaths. Health utilities for TKR plus non-surgical treatment vs non-surgical treatment alone at baseline and at 3 months, 6 months, 12 months and 24 months follow-up.**

| Utilities | TKR+non-surgical group |          |          |           |           |                        | Non-surgical group |          |          |           |           |                        |
|-----------|------------------------|----------|----------|-----------|-----------|------------------------|--------------------|----------|----------|-----------|-----------|------------------------|
|           | Baseline               | 3 months | 6 months | 12 months | 24 months | 24 months (discounted) | Baseline           | 3 months | 6 months | 12 months | 24 months | 24 months (discounted) |
| Mean      | 0.661                  | 0.845    | 0.865    | 0.861     | 0.821     | 0.797                  | 0.681              | 0.780    | 0.757    | 0.795     | 0.742     | 0.721                  |
| SD        | 0.156                  | 0.145    | 0.139    | 0.177     | 0.266     | 0.258                  | 0.147              | 0.117    | 0.157    | 0.151     | 0.225     | 0.219                  |
| Median    | 0.723                  | 0.824    | 0.824    | 0.919     | 1.000     | 0.971                  | 0.723              | 0.776    | 0.776    | 0.776     | 0.776     | 0.753                  |
| 25th      | 0.655                  | 0.750    | 0.776    | 0.776     | 0.723     | 0.702                  | 0.655              | 0.723    | 0.723    | 0.723     | 0.723     | 0.701                  |
| 75th      | 0.723                  | 1.000    | 1.000    | 1.000     | 1.000     | 0.971                  | 0.771              | 0.824    | 0.824    | 1.000     | 0.831     | 0.807                  |
| N         | 50                     | 40       | 42       | 46        | 46        | 46                     | 50                 | 46       | 49       | 49        | 48        | 48                     |

TKR=Total knee replacement; QALY=quality-adjusted life-years; discounted= i.e. future health utilities value converted to present health utilities value.

**Supp. table 2. Sub-analysis including deaths. Incremental cost-effectiveness ratios (ICERs) and probability of cost-effectiveness of TKR plus non-surgical treatment vs non-surgical treatment alone for each scenario.**

| Analysis   | Incremental cost | 95% CI          | Incremental effect | 95% CI          | ICER   | Probability of cost-effectiveness at € 22,665 |
|------------|------------------|-----------------|--------------------|-----------------|--------|-----------------------------------------------|
|            | €                |                 | QALY               |                 | €/QALY | %                                             |
| Base-case  | 7,880            | 2,894 to 12,867 | 0.123              | -0.011 to 0.257 | 64,208 | 7.8                                           |
| Scenario 1 | 8,585            | 2,442 to 14,728 | 0.178              | 0.011 to 0.346  | 48,128 | 12.4                                          |
| Scenario 2 | 8,805            | 2,201 to 15,409 | 0.190              | 0.023 to 0.357  | 46,277 | 13.8                                          |

TKR=Total knee replacement; QALY=quality-adjusted life-years; 95% CI=95% confidence interval

Base-case=QALY adjusted for age, sex and baseline value

Scenario 1=unadjusted; Scenario 2=unadjusted and without imputation of missing values

Supp. figure 1. Cost-effectiveness plane showing the uncertainty around the ICER (excl. deaths).

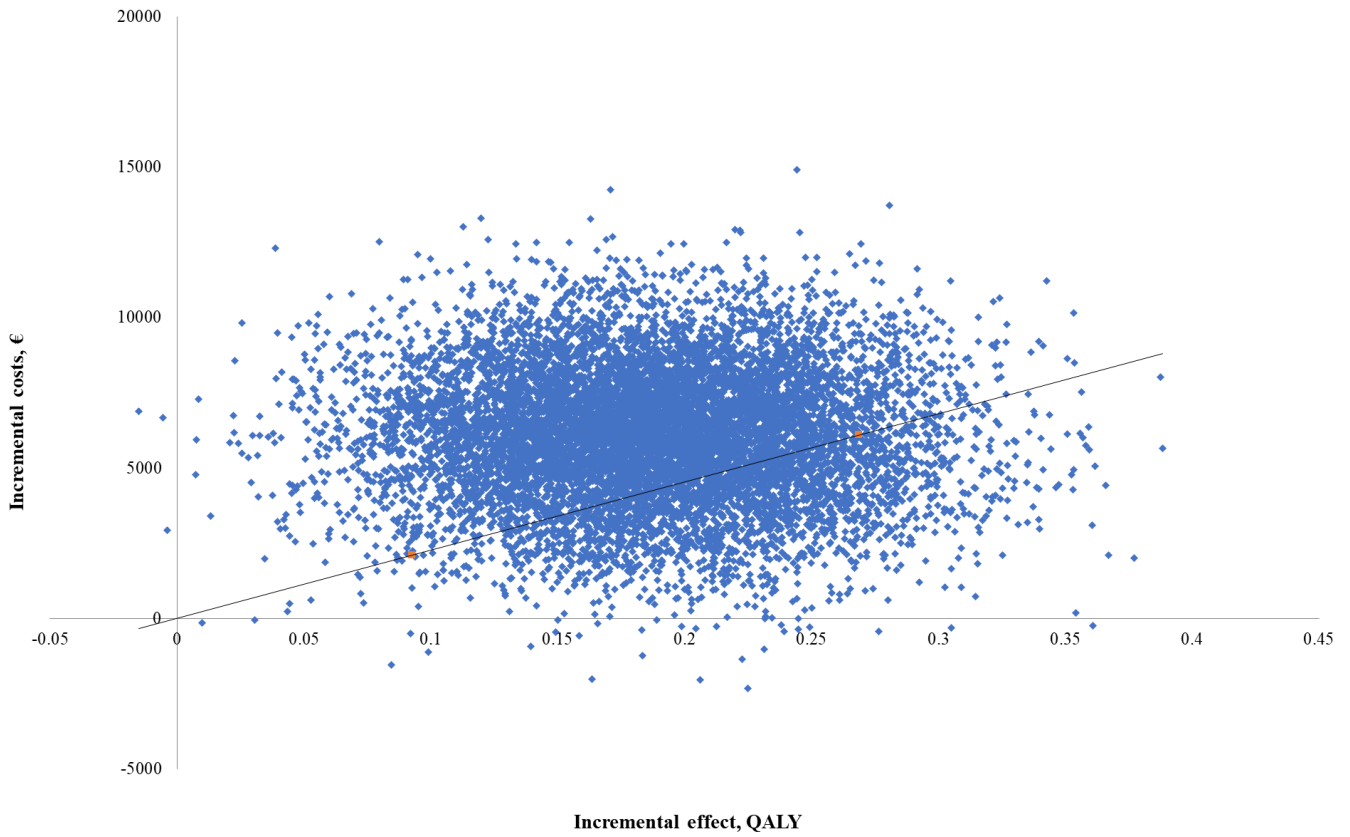

view only

## CHEERS Checklist

### Items to include when reporting economic evaluations of health interventions

The **ISPOR CHEERS Task Force Report**, *Consolidated Health Economic Evaluation Reporting Standards (CHEERS)—Explanation and Elaboration: A Report of the ISPOR Health Economic Evaluations Publication Guidelines Good Reporting Practices Task Force*, provides examples and further discussion of the 24-item CHEERS Checklist and the CHEERS Statement. It may be accessed via the *Value in Health* or via the ISPOR Health Economic Evaluation Publication Guidelines – CHEERS: Good Reporting Practices webpage: <http://www.ispor.org/TaskForces/EconomicPubGuidelines.asp>

| Section/item                    | Item No | Recommendation                                                                                                                                                                             | Reported on page No/line No |
|---------------------------------|---------|--------------------------------------------------------------------------------------------------------------------------------------------------------------------------------------------|-----------------------------|
| <b>Title and abstract</b>       |         |                                                                                                                                                                                            |                             |
| Title                           | 1       | Identify the study as an economic evaluation or use more specific terms such as “cost-effectiveness analysis”, and describe the interventions compared.                                    | 1                           |
| Abstract                        | 2       | Provide a structured summary of objectives, perspective, setting, methods (including study design and inputs), results (including base case and uncertainty analyses), and conclusions.    | 2                           |
| <b>Introduction</b>             |         |                                                                                                                                                                                            |                             |
| Background and objectives       | 3       | Provide an explicit statement of the broader context for the study.<br>Present the study question and its relevance for health policy or practice decisions.                               | 4                           |
| <b>Methods</b>                  |         |                                                                                                                                                                                            |                             |
| Target population and subgroups | 4       | Describe characteristics of the base case population and subgroups analysed, including why they were chosen.                                                                               | 6-7                         |
| Setting and location            | 5       | State relevant aspects of the system(s) in which the decision(s) need(s) to be made.                                                                                                       | 7                           |
| Study perspective               | 6       | Describe the perspective of the study and relate this to the costs being evaluated.                                                                                                        | 6-7                         |
| Comparators                     | 7       | Describe the interventions or strategies being compared and state why they were chosen.                                                                                                    | 7-9                         |
| Time horizon                    | 8       | State the time horizon(s) over which costs and consequences are being evaluated and say why appropriate.                                                                                   | 7                           |
| Discount rate                   | 9       | Report the choice of discount rate(s) used for costs and outcomes and say why appropriate.                                                                                                 | 13                          |
| Choice of health outcomes       | 10      | Describe what outcomes were used as the measure(s) of benefit in the evaluation and their relevance for the type of analysis performed.                                                    | 11                          |
| Measurement of effectiveness    | 11a     | <i>Single study-based estimates:</i> Describe fully the design features of the single effectiveness study and why the single study was a sufficient source of clinical effectiveness data. | 4+6                         |



|    |                                                        |     |                                                                                                                                                                                                                                                                                                                                                       |       |
|----|--------------------------------------------------------|-----|-------------------------------------------------------------------------------------------------------------------------------------------------------------------------------------------------------------------------------------------------------------------------------------------------------------------------------------------------------|-------|
| 1  |                                                        | 11b | <i>Synthesis-based estimates:</i> Describe fully the methods used for identification of included studies and synthesis of clinical effectiveness data.                                                                                                                                                                                                | N/A   |
| 2  |                                                        |     |                                                                                                                                                                                                                                                                                                                                                       |       |
| 3  |                                                        |     |                                                                                                                                                                                                                                                                                                                                                       |       |
| 4  | Measurement and valuation of preference based outcomes | 12  | If applicable, describe the population and methods used to elicit preferences for outcomes.                                                                                                                                                                                                                                                           | N/A   |
| 5  |                                                        |     |                                                                                                                                                                                                                                                                                                                                                       |       |
| 6  | Estimating resources and costs                         | 13a | <i>Single study-based economic evaluation:</i> Describe approaches used to estimate resource use associated with the alternative interventions. Describe primary or secondary research methods for valuing each resource item in terms of its unit cost. Describe any adjustments made to approximate to opportunity costs.                           | 9-11  |
| 7  |                                                        |     |                                                                                                                                                                                                                                                                                                                                                       |       |
| 8  |                                                        | 13b | <i>Model-based economic evaluation:</i> Describe approaches and data sources used to estimate resource use associated with model health states. Describe primary or secondary research methods for valuing each resource item in terms of its unit cost. Describe any adjustments made to approximate to opportunity costs.                           | N/A   |
| 9  |                                                        |     |                                                                                                                                                                                                                                                                                                                                                       |       |
| 10 | Currency, price date, and conversion                   | 14  | Report the dates of the estimated resource quantities and unit costs. Describe methods for adjusting estimated unit costs to the year of reported costs if necessary. Describe methods for converting costs into a common currency base and the exchange rate.                                                                                        | 7+10  |
| 11 |                                                        |     |                                                                                                                                                                                                                                                                                                                                                       |       |
| 12 | Choice of model                                        | 15  | Describe and give reasons for the specific type of decision-analytical model used. Providing a figure to show model structure is strongly recommended.                                                                                                                                                                                                | 12-13 |
| 13 |                                                        |     |                                                                                                                                                                                                                                                                                                                                                       |       |
| 14 | Assumptions                                            | 16  | Describe all structural or other assumptions underpinning the decision-analytical model.                                                                                                                                                                                                                                                              | 12-13 |
| 15 |                                                        |     |                                                                                                                                                                                                                                                                                                                                                       |       |
| 16 | Analytical methods                                     | 17  | Describe all analytical methods supporting the evaluation. This could include methods for dealing with skewed, missing, or censored data; extrapolation methods; methods for pooling data; approaches to validate or make adjustments (such as half cycle corrections) to a model; and methods for handling population heterogeneity and uncertainty. | 12-13 |
| 17 |                                                        |     |                                                                                                                                                                                                                                                                                                                                                       |       |
| 18 |                                                        |     |                                                                                                                                                                                                                                                                                                                                                       |       |
| 19 | <b>Results</b>                                         |     |                                                                                                                                                                                                                                                                                                                                                       |       |
| 20 | Study parameters                                       | 18  | Report the values, ranges, references, and, if used, probability distributions for all parameters. Report reasons or sources for distributions used to represent uncertainty where appropriate. Providing a table to show the input values is strongly recommended.                                                                                   | 14-16 |
| 21 |                                                        |     |                                                                                                                                                                                                                                                                                                                                                       |       |
| 22 | Incremental costs and outcomes                         | 19  | For each intervention, report mean values for the main categories of estimated costs and outcomes of interest, as well as mean differences between the comparator groups. If applicable, report incremental cost-effectiveness ratios.                                                                                                                | 14-16 |
| 23 |                                                        |     |                                                                                                                                                                                                                                                                                                                                                       |       |
| 24 | Characterising uncertainty                             | 20a | <i>Single study-based economic evaluation:</i> Describe the effects of sampling uncertainty for the estimated incremental cost and incremental effectiveness parameters, together with the impact                                                                                                                                                     |       |
| 25 |                                                        |     |                                                                                                                                                                                                                                                                                                                                                       |       |
| 26 |                                                        |     |                                                                                                                                                                                                                                                                                                                                                       |       |
| 27 |                                                        |     |                                                                                                                                                                                                                                                                                                                                                       |       |
| 28 |                                                        |     |                                                                                                                                                                                                                                                                                                                                                       |       |
| 29 |                                                        |     |                                                                                                                                                                                                                                                                                                                                                       |       |
| 30 |                                                        |     |                                                                                                                                                                                                                                                                                                                                                       |       |
| 31 |                                                        |     |                                                                                                                                                                                                                                                                                                                                                       |       |
| 32 |                                                        |     |                                                                                                                                                                                                                                                                                                                                                       |       |
| 33 |                                                        |     |                                                                                                                                                                                                                                                                                                                                                       |       |
| 34 |                                                        |     |                                                                                                                                                                                                                                                                                                                                                       |       |
| 35 |                                                        |     |                                                                                                                                                                                                                                                                                                                                                       |       |
| 36 |                                                        |     |                                                                                                                                                                                                                                                                                                                                                       |       |
| 37 |                                                        |     |                                                                                                                                                                                                                                                                                                                                                       |       |
| 38 |                                                        |     |                                                                                                                                                                                                                                                                                                                                                       |       |
| 39 |                                                        |     |                                                                                                                                                                                                                                                                                                                                                       |       |
| 40 |                                                        |     |                                                                                                                                                                                                                                                                                                                                                       |       |
| 41 |                                                        |     |                                                                                                                                                                                                                                                                                                                                                       |       |
| 42 |                                                        |     |                                                                                                                                                                                                                                                                                                                                                       |       |
| 43 |                                                        |     |                                                                                                                                                                                                                                                                                                                                                       |       |
| 44 |                                                        |     |                                                                                                                                                                                                                                                                                                                                                       |       |
| 45 |                                                        |     |                                                                                                                                                                                                                                                                                                                                                       |       |
| 46 |                                                        |     |                                                                                                                                                                                                                                                                                                                                                       |       |
| 47 |                                                        |     |                                                                                                                                                                                                                                                                                                                                                       |       |
| 48 |                                                        |     |                                                                                                                                                                                                                                                                                                                                                       |       |
| 49 |                                                        |     |                                                                                                                                                                                                                                                                                                                                                       |       |
| 50 |                                                        |     |                                                                                                                                                                                                                                                                                                                                                       |       |
| 51 |                                                        |     |                                                                                                                                                                                                                                                                                                                                                       |       |
| 52 |                                                        |     |                                                                                                                                                                                                                                                                                                                                                       |       |
| 53 |                                                        |     |                                                                                                                                                                                                                                                                                                                                                       |       |
| 54 |                                                        |     |                                                                                                                                                                                                                                                                                                                                                       |       |
| 55 |                                                        |     |                                                                                                                                                                                                                                                                                                                                                       |       |
| 56 |                                                        |     |                                                                                                                                                                                                                                                                                                                                                       |       |
| 57 |                                                        |     |                                                                                                                                                                                                                                                                                                                                                       |       |
| 58 |                                                        |     |                                                                                                                                                                                                                                                                                                                                                       |       |
| 59 |                                                        |     |                                                                                                                                                                                                                                                                                                                                                       |       |
| 60 |                                                        |     |                                                                                                                                                                                                                                                                                                                                                       |       |

|    |                                                                      |                                                                                                                                                                                                                                                                            |       |
|----|----------------------------------------------------------------------|----------------------------------------------------------------------------------------------------------------------------------------------------------------------------------------------------------------------------------------------------------------------------|-------|
| 1  |                                                                      | of methodological assumptions (such as discount rate, study perspective).                                                                                                                                                                                                  | 14-16 |
| 2  |                                                                      |                                                                                                                                                                                                                                                                            |       |
| 3  |                                                                      |                                                                                                                                                                                                                                                                            |       |
| 4  | 20b                                                                  | <i>Model-based economic evaluation</i> : Describe the effects on the results of uncertainty for all input parameters, and uncertainty related to the structure of the model and assumptions.                                                                               | N/A   |
| 5  |                                                                      |                                                                                                                                                                                                                                                                            |       |
| 6  |                                                                      |                                                                                                                                                                                                                                                                            |       |
| 7  | Characterising heterogeneity                                         | 21                                                                                                                                                                                                                                                                         |       |
| 8  |                                                                      | If applicable, report differences in costs, outcomes, or cost-effectiveness that can be explained by variations between subgroups of patients with different baseline characteristics or other observed variability in effects that are not reducible by more information. | 16    |
| 9  |                                                                      |                                                                                                                                                                                                                                                                            |       |
| 10 |                                                                      |                                                                                                                                                                                                                                                                            |       |
| 11 |                                                                      |                                                                                                                                                                                                                                                                            |       |
| 12 |                                                                      |                                                                                                                                                                                                                                                                            |       |
| 13 | <b>Discussion</b>                                                    |                                                                                                                                                                                                                                                                            |       |
| 14 | Study findings, limitations, generalisability, and current knowledge | 22                                                                                                                                                                                                                                                                         |       |
| 15 |                                                                      | Summarise key study findings and describe how they support the conclusions reached. Discuss limitations and the generalisability of the findings and how the findings fit with current knowledge.                                                                          | 17-19 |
| 16 |                                                                      |                                                                                                                                                                                                                                                                            |       |
| 17 |                                                                      |                                                                                                                                                                                                                                                                            |       |
| 18 |                                                                      |                                                                                                                                                                                                                                                                            |       |
| 19 | <b>Other</b>                                                         |                                                                                                                                                                                                                                                                            |       |
| 20 | Source of funding                                                    | 23                                                                                                                                                                                                                                                                         |       |
| 21 |                                                                      | Describe how the study was funded and the role of the funder in the identification, design, conduct, and reporting of the analysis. Describe other non-monetary sources of support.                                                                                        | 21-22 |
| 22 |                                                                      |                                                                                                                                                                                                                                                                            |       |
| 23 |                                                                      |                                                                                                                                                                                                                                                                            |       |
| 24 | Conflicts of interest                                                | 24                                                                                                                                                                                                                                                                         |       |
| 25 |                                                                      | Describe any potential for conflict of interest of study contributors in accordance with journal policy. In the absence of a journal policy, we recommend authors comply with International Committee of Medical Journal Editors recommendations.                          | 21-22 |
| 26 |                                                                      |                                                                                                                                                                                                                                                                            |       |
| 27 |                                                                      |                                                                                                                                                                                                                                                                            |       |
| 28 |                                                                      |                                                                                                                                                                                                                                                                            |       |
| 29 |                                                                      |                                                                                                                                                                                                                                                                            |       |

For consistency, the CHEERS Statement checklist format is based on the format of the CONSORT statement checklist

The **ISPOR CHEERS Task Force Report** provides examples and further discussion of the 24-item CHEERS Checklist and the CHEERS Statement. It may be accessed via the *Value in Health* link or via the ISPOR Health Economic Evaluation Publication Guidelines – CHEERS: Good Reporting Practices webpage: <http://www.ispor.org/TaskForces/EconomicPubGuidelines.asp>

The citation for the CHEERS Task Force Report is:

Husereau D, Drummond M, Petrou S, et al. Consolidated health economic evaluation reporting standards (CHEERS)—Explanation and elaboration: A report of the ISPOR health economic evaluations publication guidelines good reporting practices task force. *Value Health* 2013;16:231-50.

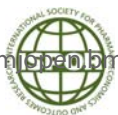

Supplement: bmjopen-2019-033495.draft_revisions.pdf [file bmjopen-2019-033495.draft_revisions.pdf]
