# Supplementary material for: Cost-effectiveness of total knee replacement in addition to non-surgical treatment: a 2-year outcome from a randomised trial in secondary care in Denmark
Source: PubMed Central journal article supplement — BMJ Open. 2020 Jan 15;10(1):e033495. doi: 10.1136/bmjopen-2019-033495 (PMC7044888; doi:10.1136/bmjopen-2019-033495), 2020-01-15

## S1. Supplementary appendix

**Supp. table 1. Sub-analysis including deaths. Health utilities for TKR plus non-surgical treatment vs non-surgical treatment alone at baseline and at 3 months, 6 months, 12 months and 24 months follow-up.**

| Utilities | TKR+non-surgical group |          |          |           |           |                        | Non-surgical group |          |          |           |           |                        |
|-----------|------------------------|----------|----------|-----------|-----------|------------------------|--------------------|----------|----------|-----------|-----------|------------------------|
|           | Baseline               | 3 months | 6 months | 12 months | 24 months | 24 months (discounted) | Baseline           | 3 months | 6 months | 12 months | 24 months | 24 months (discounted) |
| Mean      | 0.661                  | 0.845    | 0.865    | 0.861     | 0.821     | 0.797                  | 0.681              | 0.780    | 0.757    | 0.795     | 0.742     | 0.721                  |
| SD        | 0.156                  | 0.145    | 0.139    | 0.177     | 0.266     | 0.258                  | 0.147              | 0.117    | 0.157    | 0.151     | 0.225     | 0.219                  |
| Median    | 0.723                  | 0.824    | 0.824    | 0.919     | 1.000     | 0.971                  | 0.723              | 0.776    | 0.776    | 0.776     | 0.776     | 0.753                  |
| 25th      | 0.655                  | 0.750    | 0.776    | 0.776     | 0.723     | 0.702                  | 0.655              | 0.723    | 0.723    | 0.723     | 0.723     | 0.701                  |
| 75th      | 0.723                  | 1.000    | 1.000    | 1.000     | 1.000     | 0.971                  | 0.771              | 0.824    | 0.824    | 1.000     | 0.831     | 0.807                  |
| N         | 50                     | 40       | 42       | 46        | 46        | 46                     | 50                 | 46       | 49       | 49        | 48        | 48                     |

TKR=Total knee replacement; QALY=quality-adjusted life-years; discounted= i.e. future health utilities value converted to present health utilities value.

**Supp. table 2. Sub-analysis including deaths. Incremental cost-effectiveness ratios (ICERs) and probability of cost-effectiveness of TKR plus non-surgical treatment vs non-surgical treatment alone for each scenario.**

| Analysis   | Incremental cost | 95% CI          | Incremental effect | 95% CI          | ICER    | Probability of cost-effectiveness at € 22,665 |
|------------|------------------|-----------------|--------------------|-----------------|---------|-----------------------------------------------|
|            | €                |                 | QALY               |                 | €/ QALY | %                                             |
| Base-case  | 7,880            | 2,894 to 12,867 | 0.123              | -0.011 to 0.257 | 64,208  | 7.8                                           |
| Scenario 1 | 8,585            | 2,442 to 14,728 | 0.178              | 0.011 to 0.346  | 48,128  | 12.4                                          |
| Scenario 2 | 8,805            | 2,201 to 15,409 | 0.190              | 0.023 to 0.357  | 46,277  | 13.8                                          |

TKR=Total knee replacement; QALY=quality-adjusted life-years; 95% CI=95% confidence interval  
Base-case=QALY adjusted for age, sex and baseline value

Scenario 1=unadjusted; Scenario 2=unadjusted and without imputation of missing values

**Supp. figure 1. Cost-effectiveness plane showing the uncertainty around the ICER (excl. deaths).**

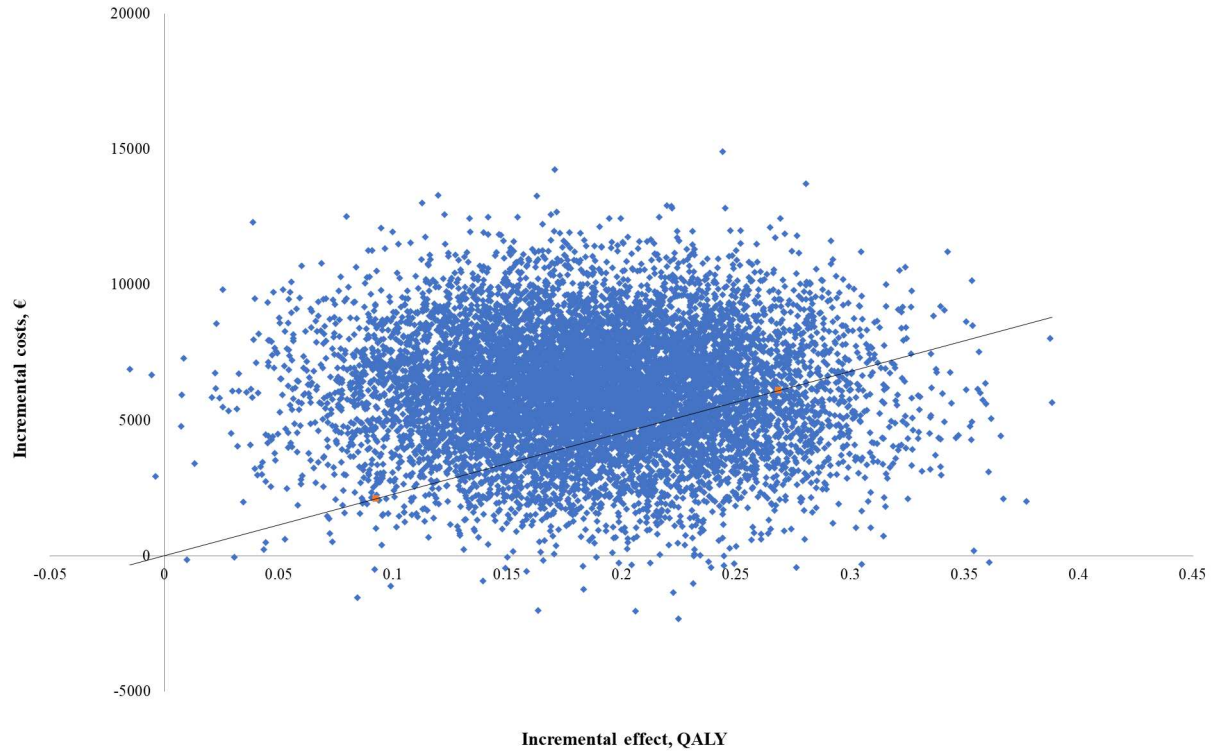

Supplement: bmjopen-2019-033495supp001.pdf [file bmjopen-2019-033495supp001.pdf]
